# Supplementary material for: Synthesis of novel benzothiazole derivatives and investigation of their enzyme inhibitory effects against Alzheimer's disease
Source: Royal Society of Chemistry journal article supplement (doi:10.1039/d2ra03803j), 2022-01-01
Supplement: d2ra03803j3.pdf [file d2ra03803j3.pdf]

## SUPPORTING INFORMATION

### Synthesis of Novel Benzothiazol Derivatives and Investigation of Their Enzyme Inhibitor Effects Against Alzheimer's Disease

Şevval Karaca<sup>a,b</sup>, Derya Osmaniye<sup>b,c</sup>, Begum Nurpelin Sağlık<sup>b,c</sup>, Serkan Levent<sup>b,c</sup>, Sinem Ilgın<sup>d</sup>, Yusuf Ozkay<sup>b,c\*</sup>, Ahmet Çağrı Karaburun<sup>b</sup>, Zafer Asım Kaplancıklı<sup>b</sup>, Nalan Gündoğdu Karaburun<sup>b</sup>

---

<sup>a.</sup> *Department of Biochemistry, Faculty of Pharmacy, Anadolu University, 26470 Eskişehir, Turkey*

<sup>b.</sup> *Department of Pharmaceutical Chemistry, Faculty of Pharmacy, Anadolu University, 26470 Eskişehir, Turkey*

<sup>c.</sup> *Central Analysis Laboratory, Faculty of Pharmacy, Anadolu University, 26470 Eskişehir, Turkey*

<sup>d.</sup> *Department of Pharmaceutical Toxicology, Faculty of Pharmacy, Anadolu University, 26470 Eskişehir, Turkey*

\* Corresponding author.

*E-mail address:* yozkay@anadolu.edu.tr (Y. Ozkay).

*Tel:* +90-222-3350580/3779 *Fax:* +90-222-3350750.

*Address:* Anadolu University, Faculty of Pharmacy, Department of Pharmaceutical Chemistry, 26470, Eskişehir, Turkey.

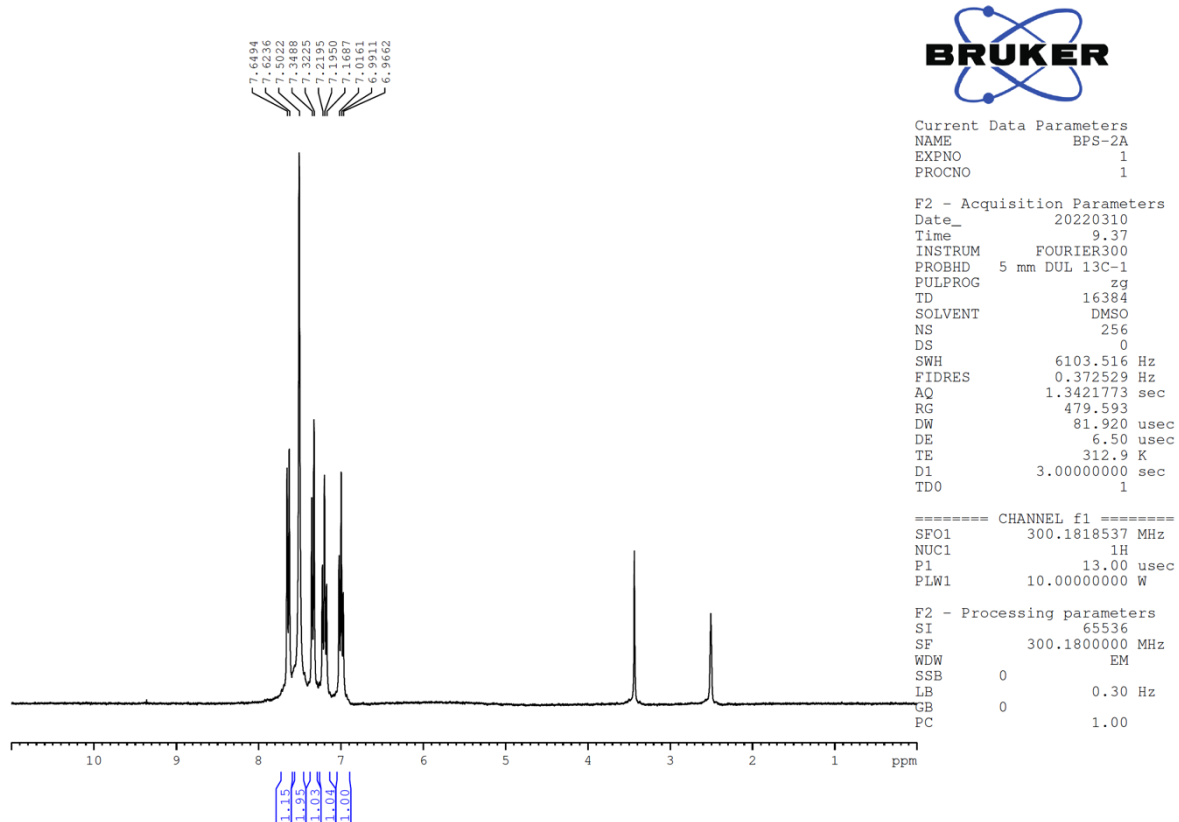

Figure S1. <sup>1</sup>H-NMR spectra of compounds 2a

Data File: C:\LabSolutions\Data\Analiz\deya\BPS-2A\_226.lcd

| Elmt | Val. | Min | Max | Use Adduct |
|------|------|-----|-----|------|------|-----|-----|------|------|-----|-----|------|------|-----|-----|------------|
| H    | 1    | 5   | 35  | O    | 2    | 0   | 5   | S    | 2    | 1   | 1   | Ru   | 2    | 0   | 0   | H          |
| C    | 4    | 5   | 30  | F    | 1    | 0   | 0   | Cl   | 1    | 0   | 0   | Pd   | 2    | 0   | 0   |            |
| N    | 3    | 0   | 5   | P    | 3    | 0   | 0   | Br   | 1    | 0   | 0   | I    | 3    | 0   | 0   |            |

Error Margin (ppm): 15  
 HC Ratio: unlimited  
 Max Isotopes: 3  
 MSn Iso RI (%): 10.00

DBE Range: 5.0 - 20.0  
 Apply N Rule: yes  
 Isotope RI (%): 1.00  
 MSn Logic Mode: AND

Electron Ions: both  
 Use MSn Info: yes  
 Isotope Res: 9000  
 Max Results: 500

Event#: 1 MS(E+) Ret. Time : 1.987 Scan#: 299

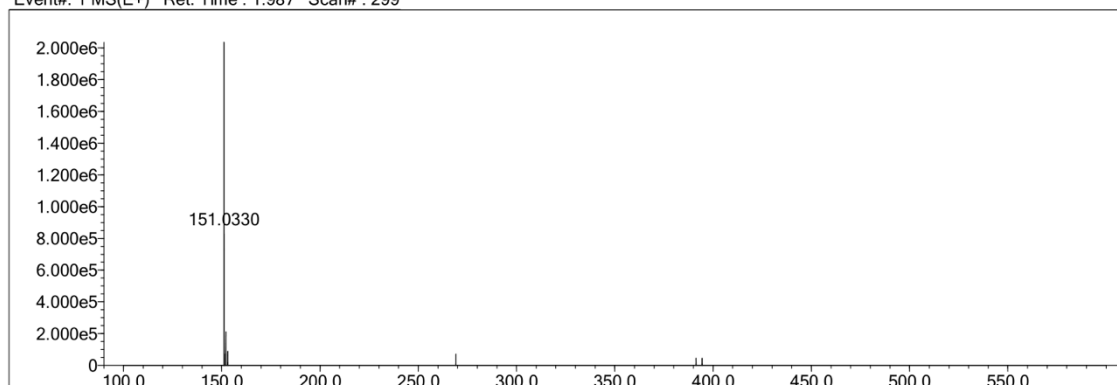

Measured region for 151.0330 m/z

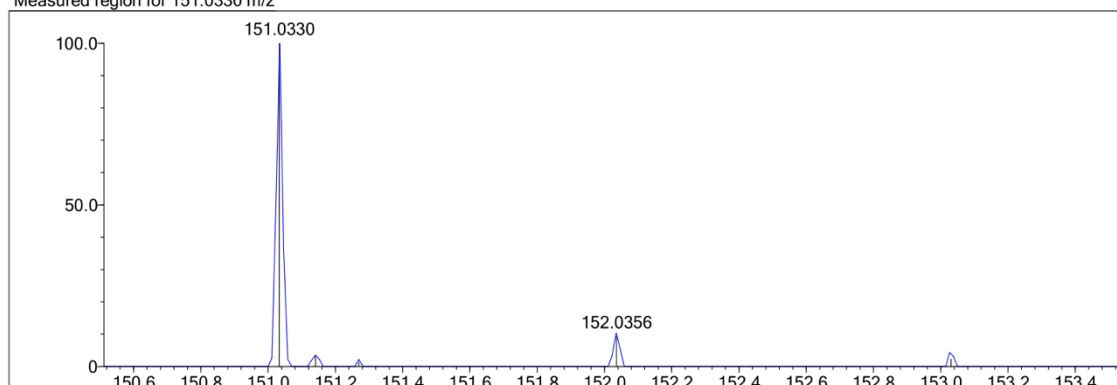

C7 H6 N2 S [M+H]<sup>+</sup> : Predicted region for 151.0324 m/z

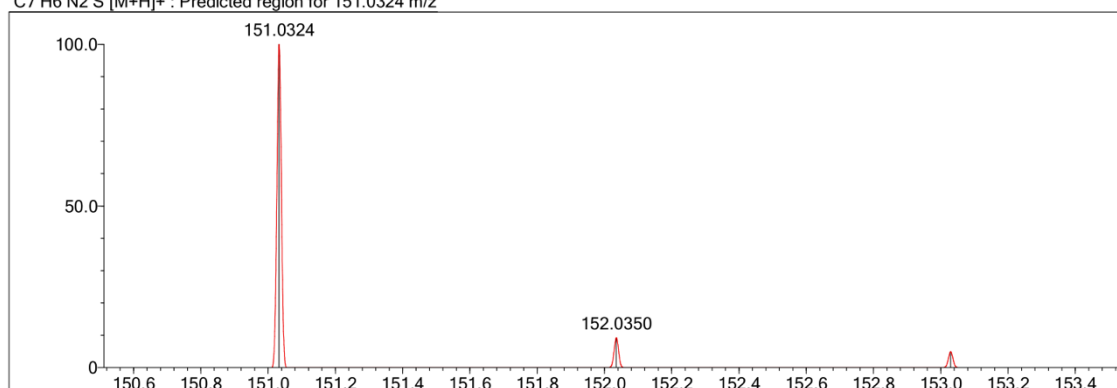

| Rank | Score | Formula (M) | Ion                | Meas. m/z | Pred. m/z | Df. (mDa) | Df. (ppm) | Iso   | DBE |
|------|-------|-------------|--------------------|-----------|-----------|-----------|-----------|-------|-----|
| 1    | 67.82 | C7 H6 N2 S  | [M+H] <sup>+</sup> | 151.0330  | 151.0324  | 0.6       | 3.97      | 73.26 | 6.0 |

Figure S2. HRMS spectra of compounds 2a

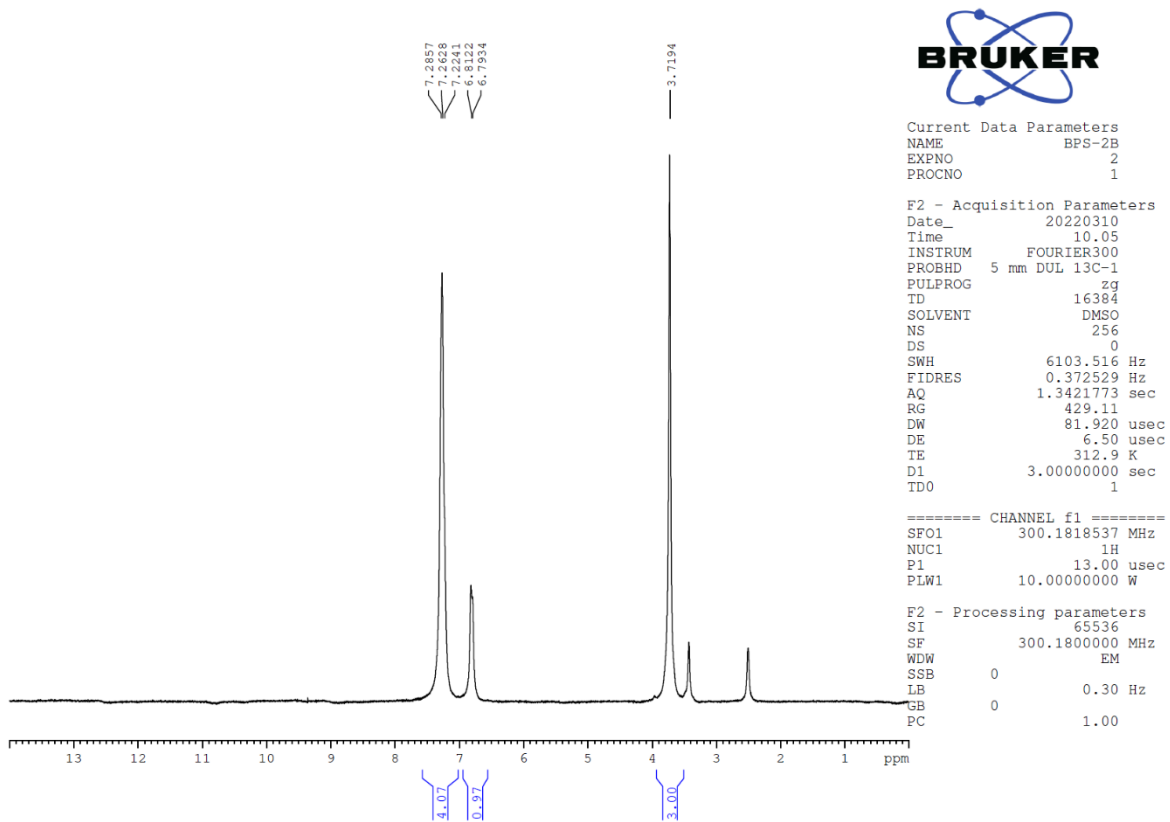

**Figure S3.** <sup>1</sup>H-NMR spectra of compounds **2b**

Data File: C:\LabSolutions\Data\Analiz\dera\BPS-2B\_227.lcd

| Elmt | Val. | Min | Max | Use Adduct |
|------|------|-----|-----|------|------|-----|-----|------|------|-----|-----|------|------|-----|-----|------------|
| H    | 1    | 5   | 35  | O    | 2    | 0   | 5   | S    | 2    | 1   | 1   | Ru   | 2    | 0   | 0   | H          |
| C    | 4    | 5   | 30  | F    | 1    | 0   | 0   | Cl   | 1    | 0   | 0   | Pd   | 2    | 0   | 0   |            |
| N    | 3    | 0   | 5   | P    | 3    | 0   | 0   | Br   | 1    | 0   | 0   | I    | 3    | 0   | 0   |            |

Error Margin (ppm): 15  
 HC Ratio: unlimited  
 Max Isotopes: 3  
 MSn Iso RI (%): 10.00

DBE Range: 5.0 - 20.0  
 Apply N Rule: yes  
 Isotope RI (%): 1.00  
 MSn Logic Mode: AND

Electron Ions: both  
 Use MSn Info: yes  
 Isotope Res: 9000  
 Max Results: 500

Event#: 1 MS(E+) Ret. Time : 2.133 -> 2.133 Scan# : 321 -> 321

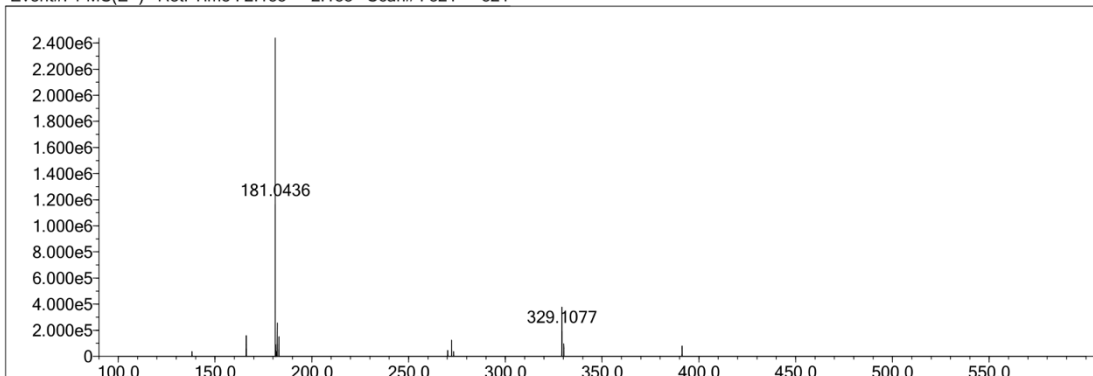

Measured region for 181.0436 m/z

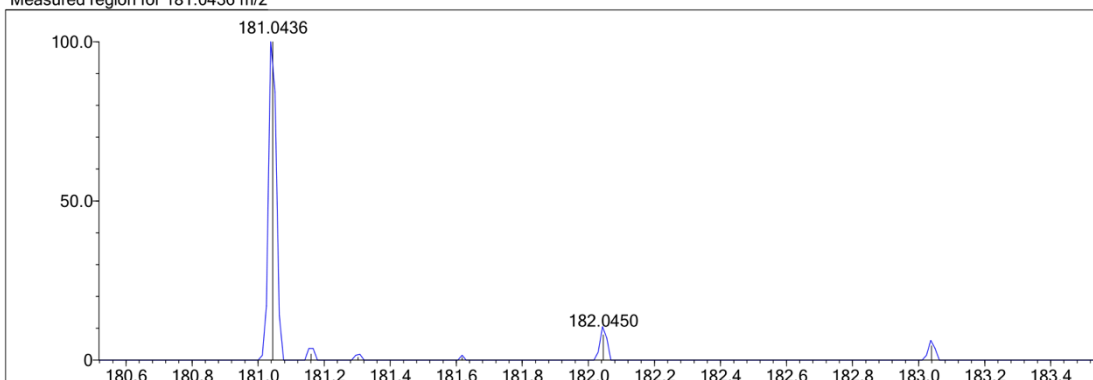

C8 H8 N2 O S [M+H]<sup>+</sup> : Predicted region for 181.0430 m/z

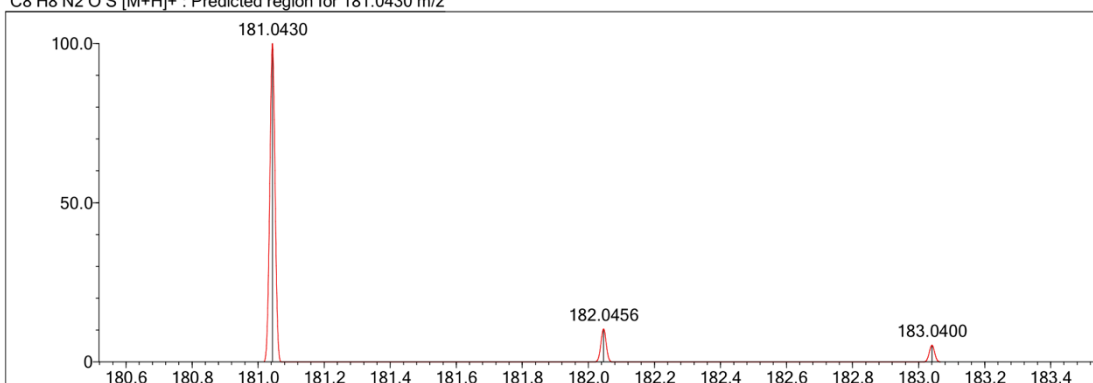

| Rank | Score | Formula (M)  | Ion                | Meas. m/z | Pred. m/z | Df. (mDa) | Df. (ppm) | Iso   | DBE |
|------|-------|--------------|--------------------|-----------|-----------|-----------|-----------|-------|-----|
| 1    | 79.33 | C8 H8 N2 O S | [M+H] <sup>+</sup> | 181.0436  | 181.0430  | 0.6       | 3.31      | 84.20 | 6.0 |

Figure S4. HRMS spectra of compounds 2b

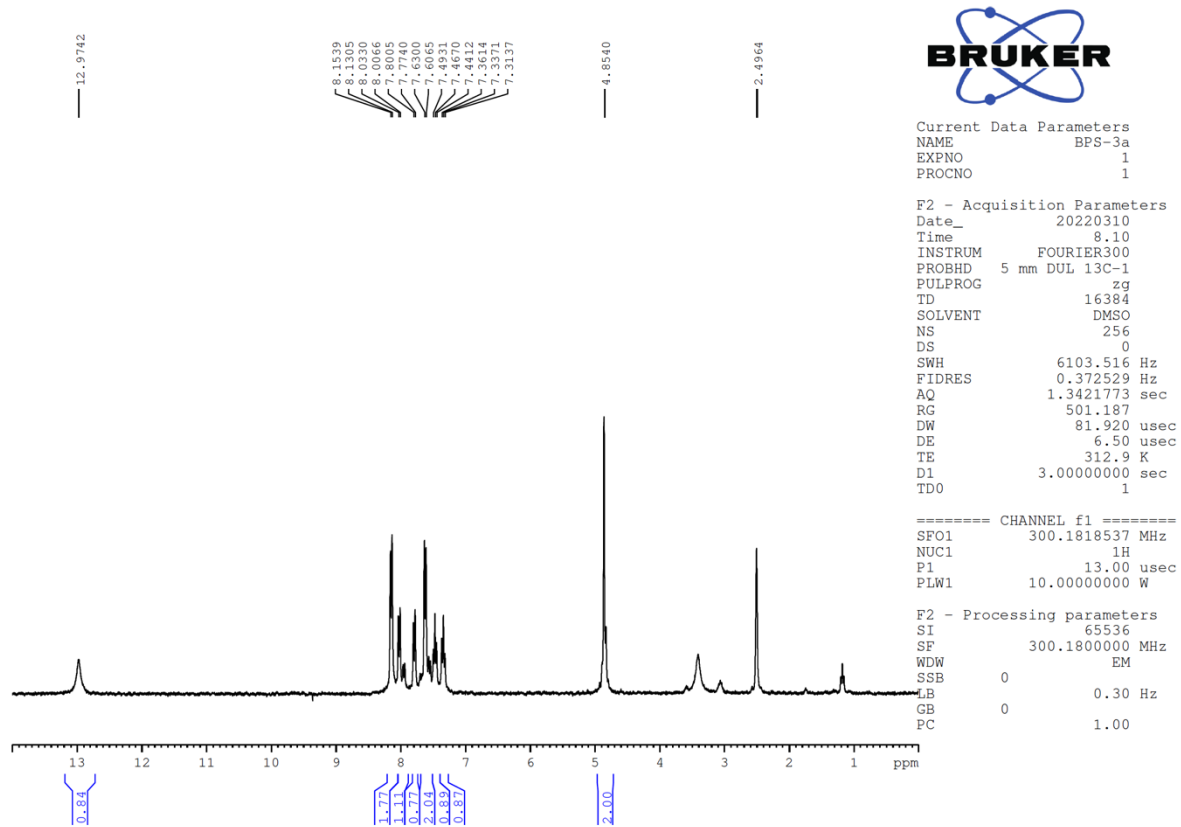

**Figure S5.**  $^1\text{H-NMR}$  spectra of compounds **3a**

Data File: C:\LabSolutions\Data\Analiz\derya\BPS-3A\_229.lcd

| Elmt | Val. | Min | Max | Use Adduct |
|------|------|-----|-----|------|------|-----|-----|------|------|-----|-----|------|------|-----|-----|------------|
| H    | 1    | 5   | 35  | O    | 2    | 0   | 5   | S    | 2    | 1   | 1   | Ru   | 2    | 0   | 0   | H          |
| C    | 4    | 5   | 30  | F    | 1    | 0   | 0   | Cl   | 1    | 0   | 1   | Pd   | 2    | 0   | 0   |            |
| N    | 3    | 0   | 5   | P    | 3    | 0   | 0   | Br   | 1    | 0   | 0   | I    | 3    | 0   | 0   |            |

Error Margin (ppm): 5  
 HC Ratio: unlimited  
 Max Isotopes: 3  
 MSn Iso RI (%): 10.00

DBE Range: 5.0 - 15.0  
 Apply N Rule: yes  
 Isotope RI (%): 1.00  
 MSn Logic Mode: AND

Electron Ions: both  
 Use MSn Info: yes  
 Isotope Res: 9000  
 Max Results: 500

Event#: 1 MS(E+) Ret. Time : 3.947 -> 4.053 Scan#: 593 -> 609

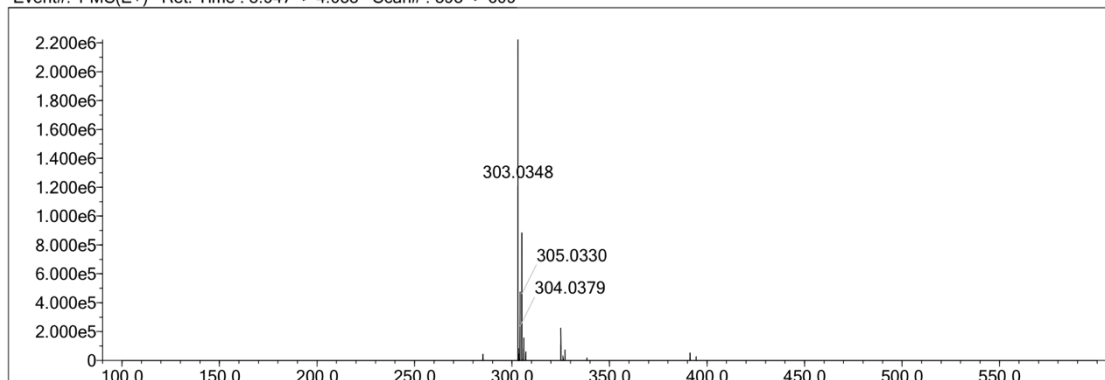

Measured region for 303.0348 m/z

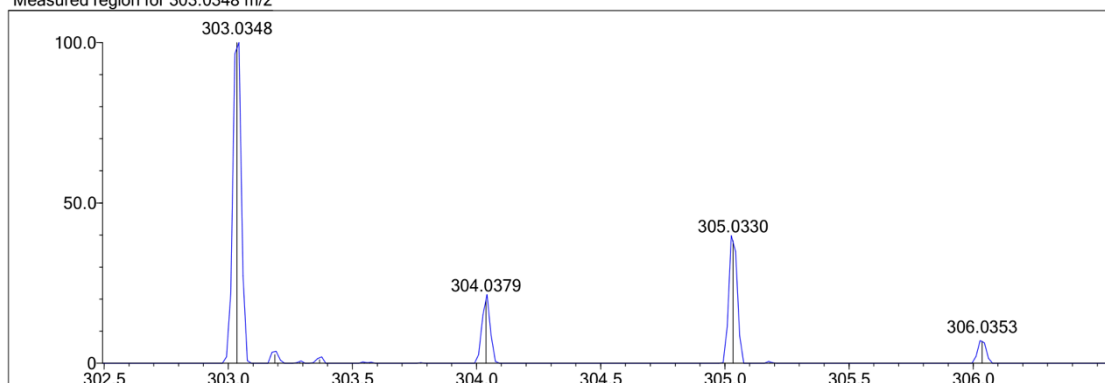

C15 H11 N2 O S Cl [M+H]<sup>+</sup> : Predicted region for 303.0353 m/z

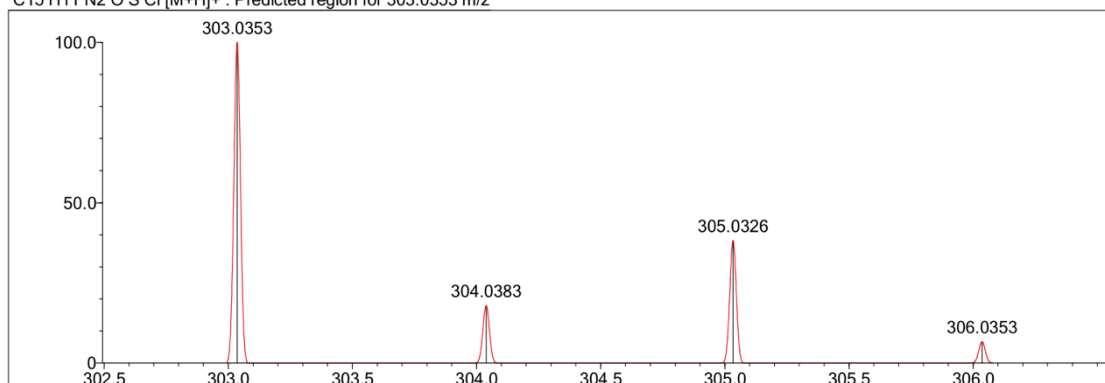

| Rank | Score | Formula (M)       | Ion                | Meas. m/z | Pred. m/z | Df. (mDa) | Df. (ppm) | Iso    | DBE  |
|------|-------|-------------------|--------------------|-----------|-----------|-----------|-----------|--------|------|
| 1    | 98.38 | C15 H11 N2 O S Cl | [M+H] <sup>+</sup> | 303.0348  | 303.0353  | -0.5      | -1.65     | 100.00 | 11.0 |

Figure S6. HRMS spectra of compounds 3a

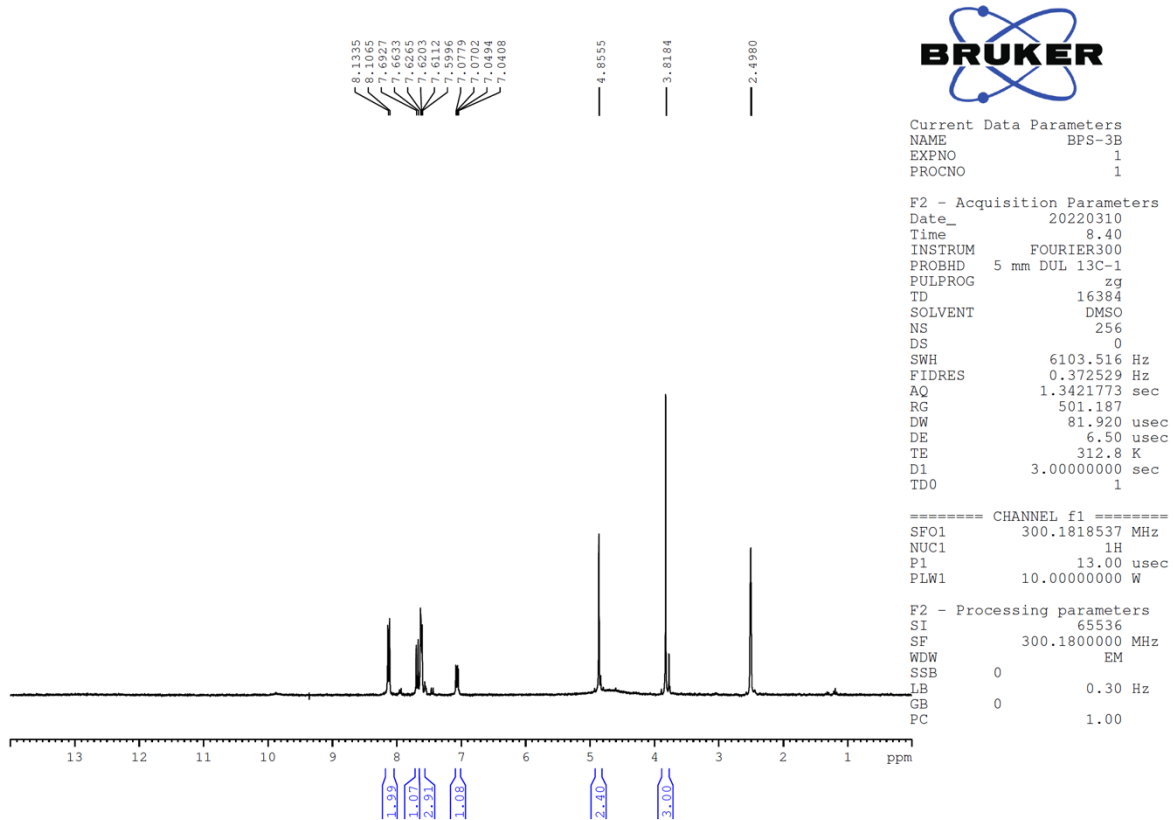

Figure S7. <sup>1</sup>H-NMR spectra of compounds **3b**



Data File: C:\LabSolutions\Data\Analiz\dera\BPS-3B\_228.lcd

| Elmt | Val. | Min | Max | Use Adduct |
|------|------|-----|-----|------|------|-----|-----|------|------|-----|-----|------|------|-----|-----|------------|
| H    | 1    | 5   | 35  | O    | 2    | 0   | 5   | S    | 2    | 1   | 1   | Ru   | 2    | 0   | 0   | H          |
| C    | 4    | 5   | 30  | F    | 1    | 0   | 0   | Cl   | 1    | 0   | 1   | Pd   | 2    | 0   | 0   |            |
| N    | 3    | 0   | 5   | P    | 3    | 0   | 0   | Br   | 1    | 0   | 0   | I    | 3    | 0   | 0   |            |

Error Margin (ppm): 5  
 HC Ratio: unlimited  
 Max Isotopes: 3  
 MSn Iso RI (%): 10.00

DBE Range: 5.0 - 20.0  
 Apply N Rule: yes  
 Isotope RI (%): 1.00  
 MSn Logic Mode: AND

Electron Ions: both  
 Use MSn Info: yes  
 Isotope Res: 9000  
 Max Results: 500

Event#: 1 MS(E+) Ret. Time : 3.693 -> 4.000 Scan#: 555 -> 601

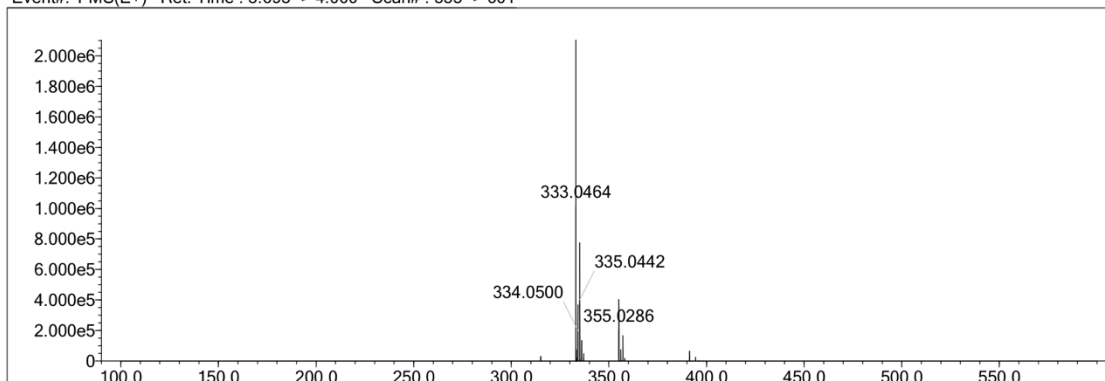

Measured region for 333.0464 m/z

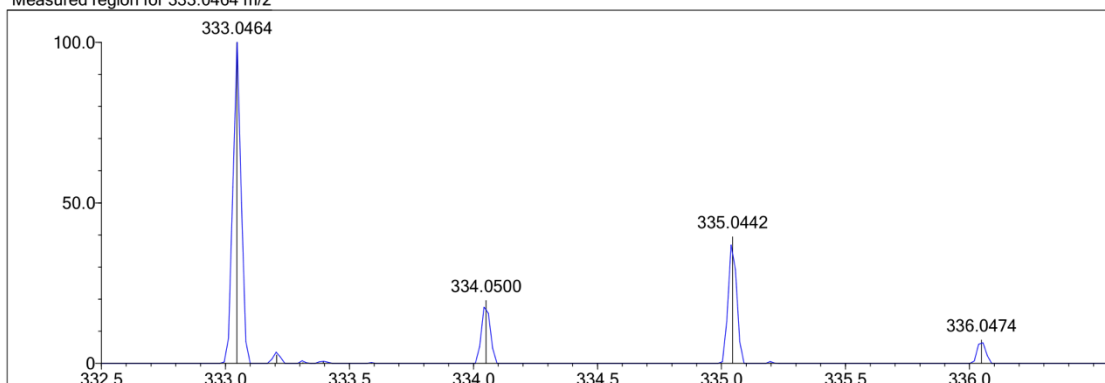

C16 H13 N2 O2 S Cl [M+H]<sup>+</sup> : Predicted region for 333.0459 m/z

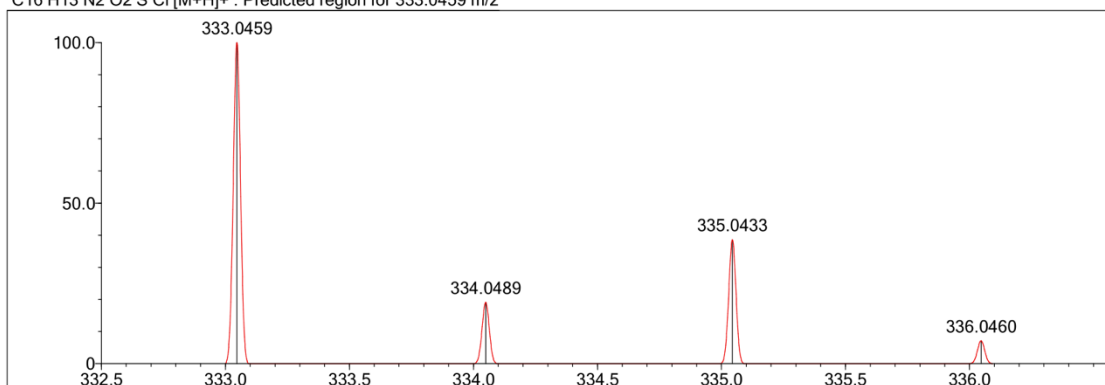

| Rank | Score | Formula (M)        | Ion                | Meas. m/z | Pred. m/z | Df. (mDa) | Df. (ppm) | Iso   | DBE  |
|------|-------|--------------------|--------------------|-----------|-----------|-----------|-----------|-------|------|
| 1    | 91.87 | C16 H13 N2 O2 S Cl | [M+H] <sup>+</sup> | 333.0464  | 333.0459  | 0.5       | 1.50      | 93.03 | 11.0 |

Figure S8. HRMS spectra of compounds **3b**

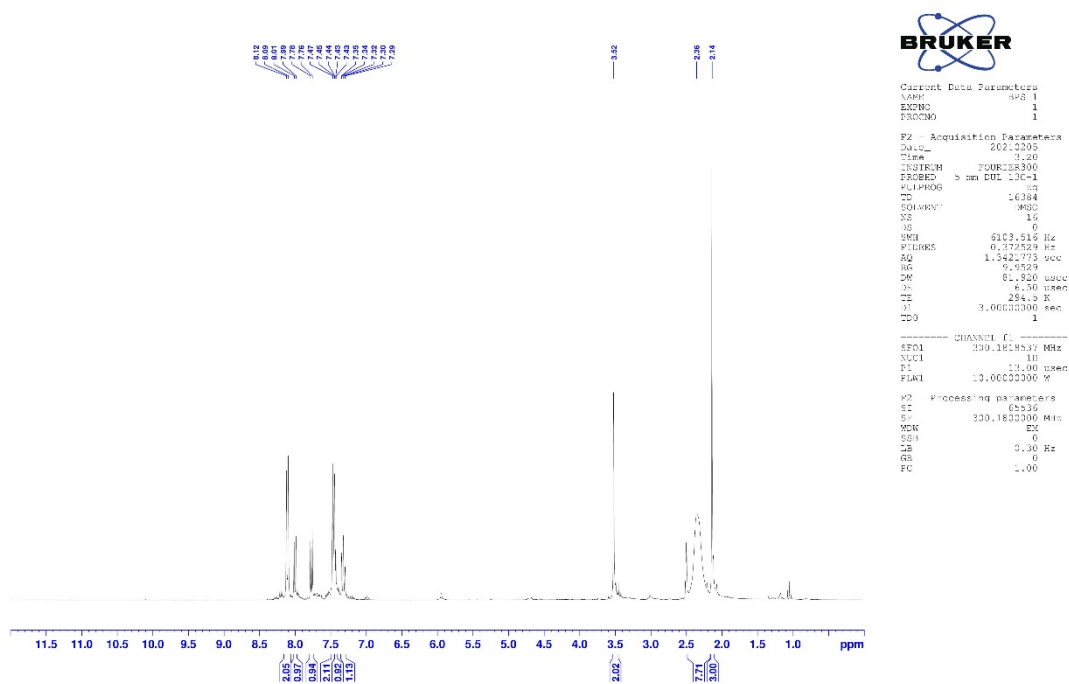

Figure S9.  $^1\text{H-NMR}$  spectra of compounds **4a**

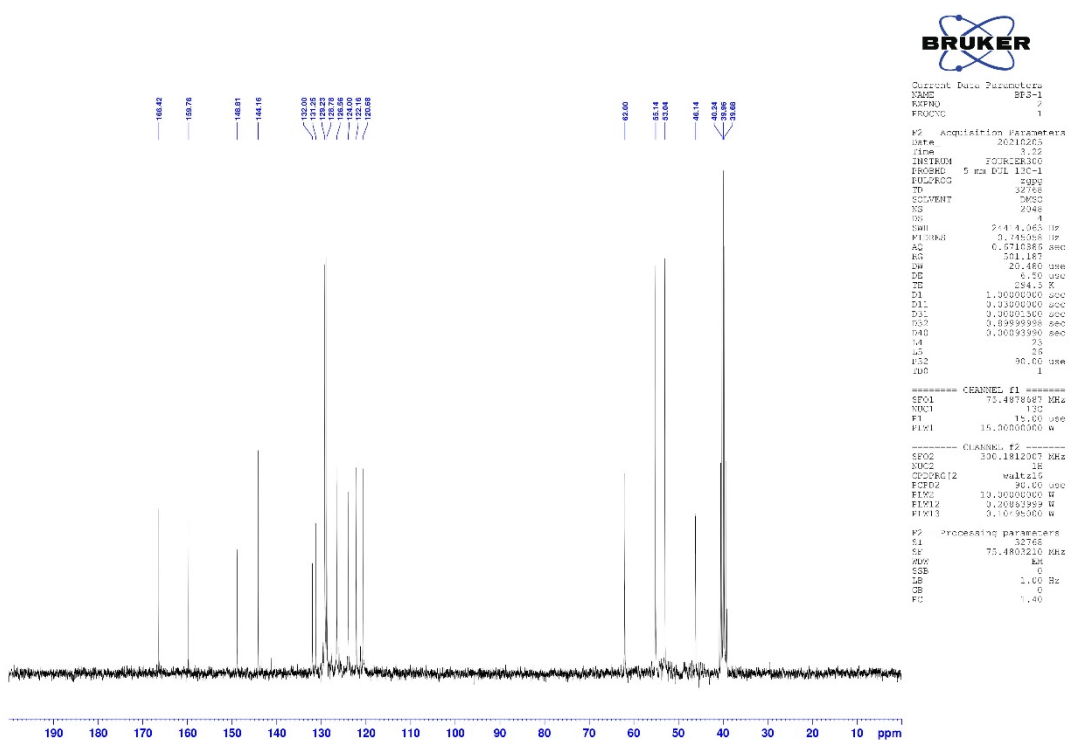

Figure S10.  $^{13}\text{C-NMR}$  spectra of compounds **4a**

Data File: C:\LabSolutions\Data\Analiz\dera\BPS-1\_158.lcd

| Elmt | Val. | Min | Max | Use Adduct |
|------|------|-----|-----|------|------|-----|-----|------|------|-----|-----|------|------|-----|-----|------------|
| H    | 1    | 10  | 40  | O    | 2    | 0   | 5   | S    | 2    | 0   | 2   | Ru   | 2    | 0   | 0   | H          |
| C    | 4    | 10  | 40  | F    | 1    | 0   | 0   | Cl   | 1    | 0   | 0   | Pd   | 2    | 0   | 0   |            |
| N    | 3    | 0   | 5   | P    | 3    | 0   | 0   | Br   | 1    | 0   | 0   | I    | 3    | 0   | 0   |            |

Error Margin (ppm): 5  
 DBE Range: 5.0 - 15.0  
 Electron Ions: both  
 HC Ratio: unlimited  
 Apply N Rule: yes  
 Use MSn Info: yes  
 Max Isotopes: 3  
 Isotope RI (%): 1.00  
 MSn Iso RI (%): 10.00  
 MSn Logic Mode: AND  
 Max Results: 150

Event#: 1 MS(E+) Ret. Time : 1.827 -> 2.520 Scan# : 275 -> 379

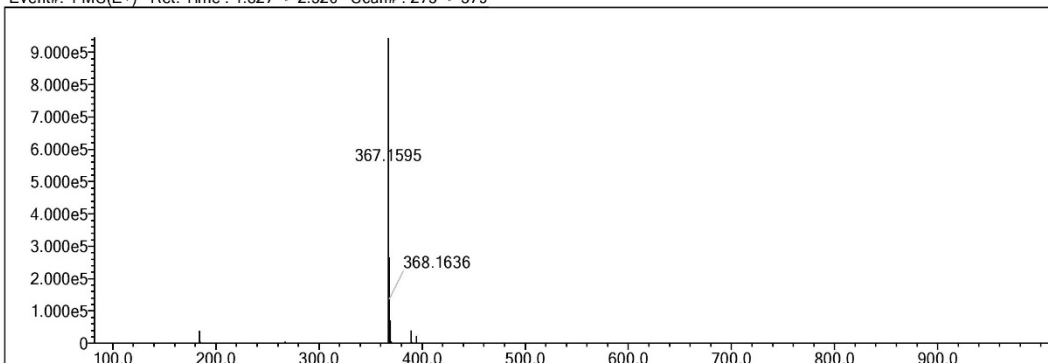

Measured region for 367.1595 m/z

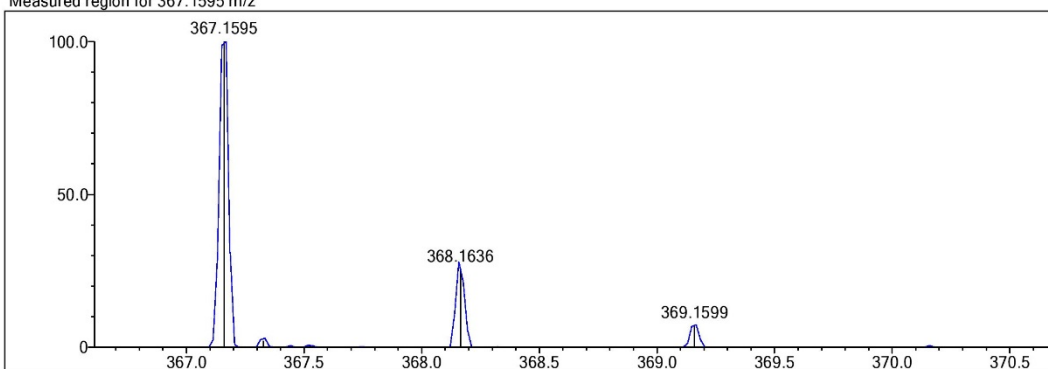

C20 H22 N4 O S [M+H]<sup>+</sup> : Predicted region for 367.1587 m/z

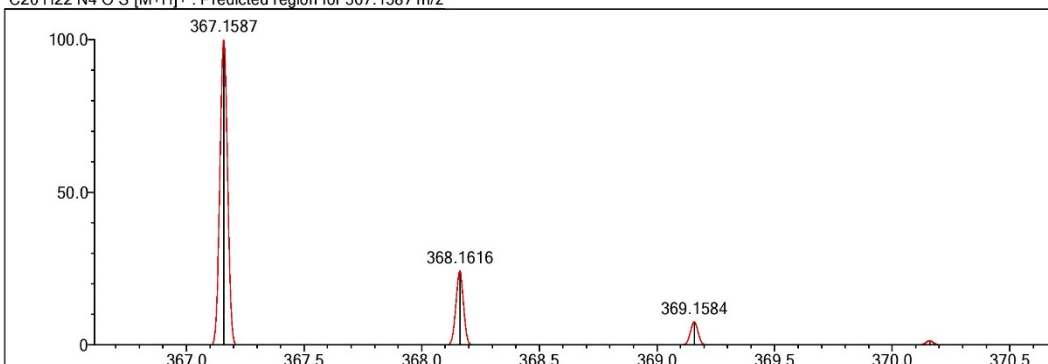

| Rank | Score | Formula (M)                                        | Ion                | Meas. m/z | Pred. m/z | Df. (mDa) | Df. (ppm) | Is     | DBE  |
|------|-------|----------------------------------------------------|--------------------|-----------|-----------|-----------|-----------|--------|------|
| 1    | 97.05 | C <sub>20</sub> H <sub>22</sub> N <sub>4</sub> O S | [M+H] <sup>+</sup> | 367.1595  | 367.1587  | 0.8       | 2.18      | 100.00 | 12.0 |

Figure S11. HRMS spectra of compounds 4a

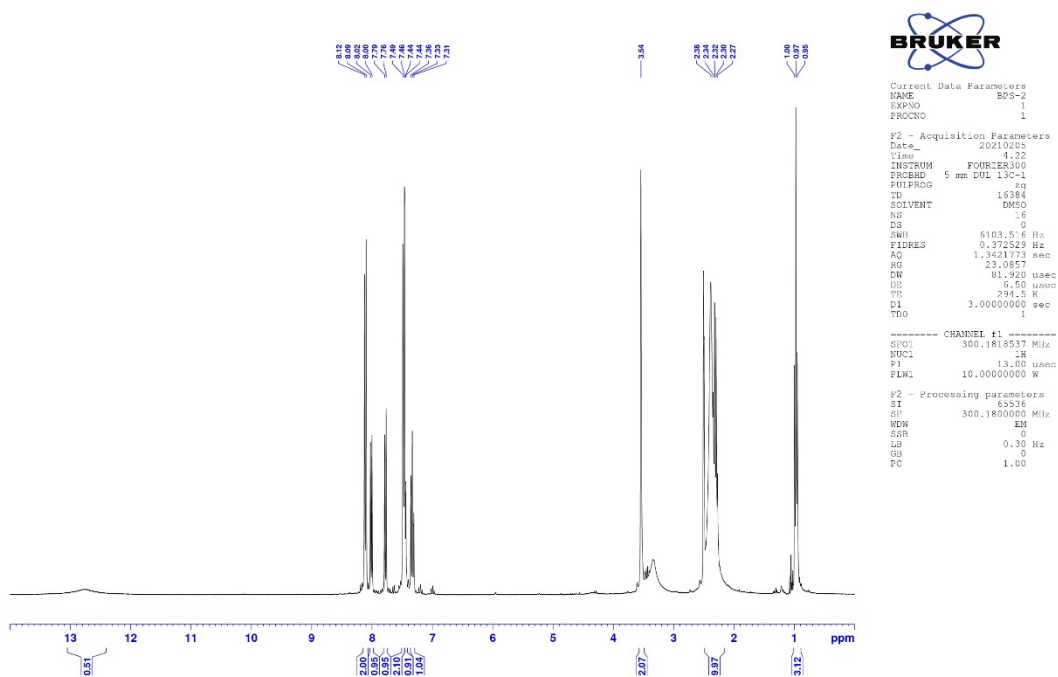

Figure S12. <sup>1</sup>H-NMR spectra of compounds **4b**

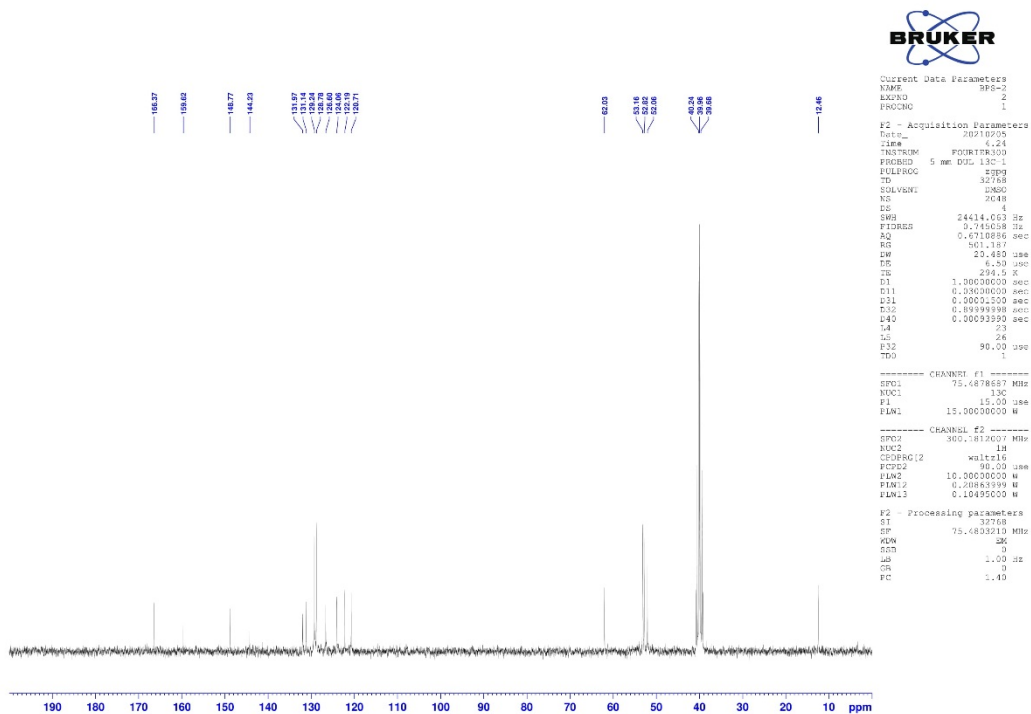

Figure S13. <sup>13</sup>C-NMR spectra of compounds **4b**

Data File: C:\LabSolutions\Data\Analiz\dera\BPS-2\_159.lcd

| Elmt | Val | Min | Max | Use Adduct |
|------|-----|-----|-----|------|-----|-----|-----|------|-----|-----|-----|------|-----|-----|-----|------------|
| H    | 1   | 10  | 40  | O    | 2   | 0   | 5   | S    | 2   | 0   | 2   | Ru   | 2   | 0   | 0   | H          |
| C    | 4   | 10  | 40  | F    | 1   | 0   | 0   | Cl   | 1   | 0   | 0   | Pd   | 2   | 0   | 0   |            |
| N    | 3   | 0   | 5   | P    | 3   | 0   | 0   | Br   | 1   | 0   | 0   | I    | 3   | 0   | 0   |            |

Error Margin (ppm): 5

DBE Range: 5.0 - 15.0

Electron Ions: both

HC Ratio: unlimited

Apply N Rule: yes

Use MSn Info: yes

Max Isotopes: 3

Isotope RI (%): 1.00

Isotope Res: 9000

MSn Iso RI (%): 10.00

MSn Logic Mode: AND

Max Results: 150

Event#: 1 MS(E+) Ret. Time : 1.920 -&gt; 2.560 Scan#: 289 -&gt; 385

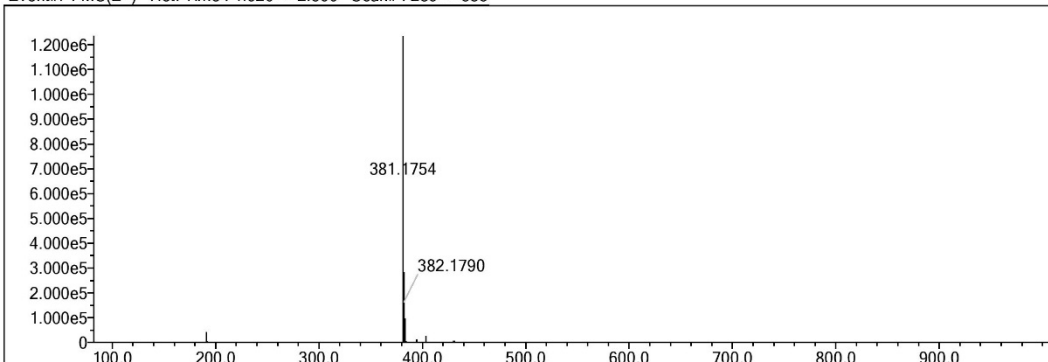

Measured region for 381.1754 m/z

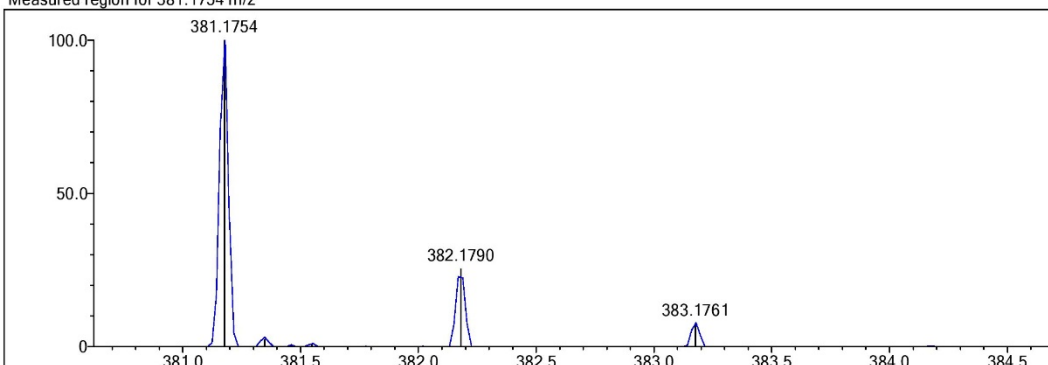C21 H24 N4 O S [M+H]<sup>+</sup> : Predicted region for 381.1744 m/z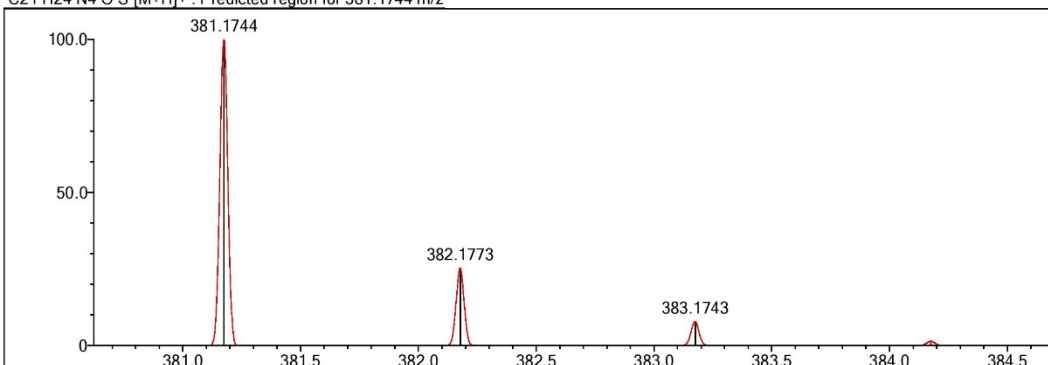

| Rank | Score | Formula (M)    | Ion                | Meas. m/z | Pred. m/z | Df. (mDa) | Df. (ppm) | Iso   | DBE  |
|------|-------|----------------|--------------------|-----------|-----------|-----------|-----------|-------|------|
| 1    | 76.93 | C21 H24 N4 O S | [M+H] <sup>+</sup> | 381.1754  | 381.1744  | 1.0       | 2.62      | 80.18 | 12.0 |

Figure S14. HRMS spectra of compounds 4b

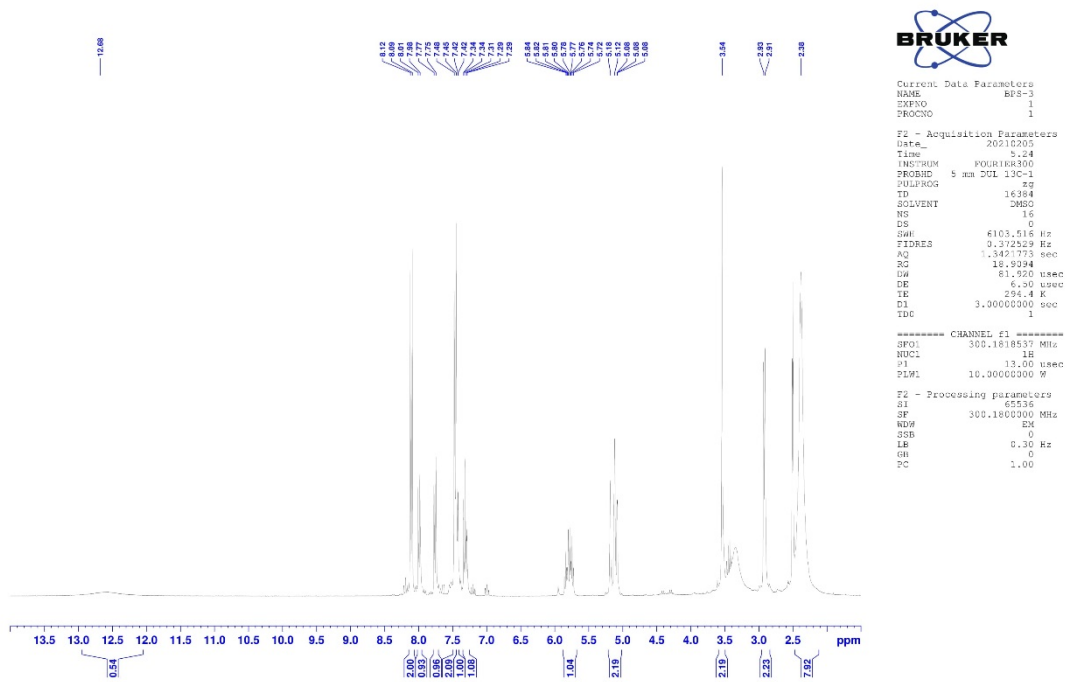

Figure S15. <sup>1</sup>H-NMR spectra of compounds 4c

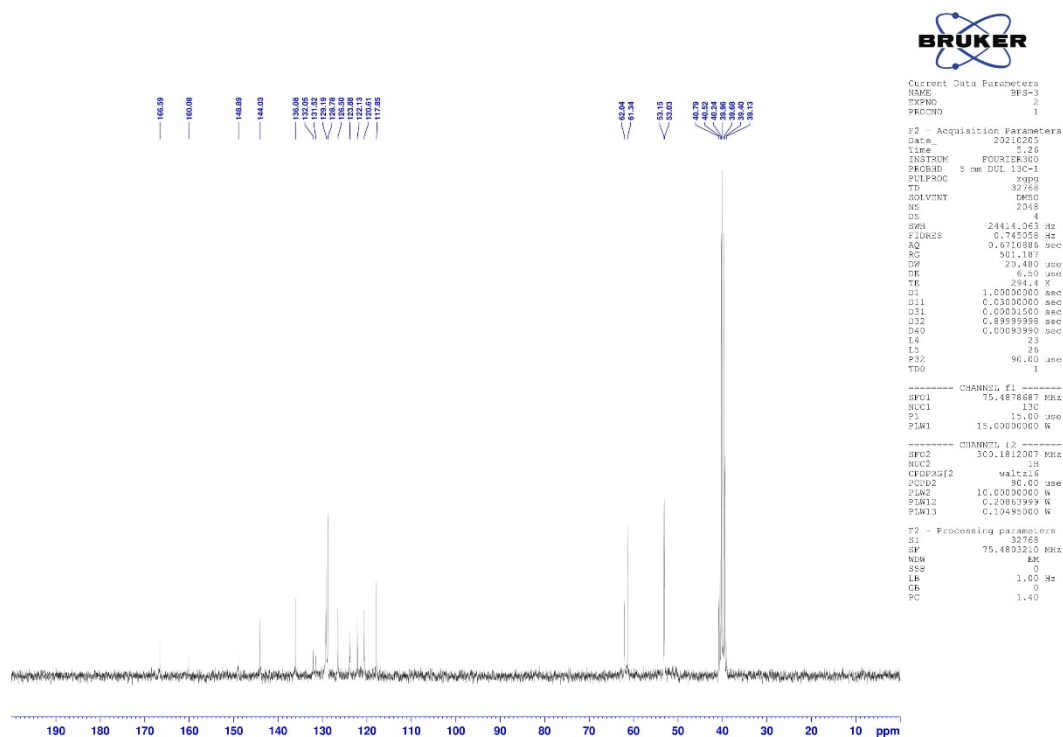

Figure S16. <sup>13</sup>C-NMR spectra of compounds 4c

Data File: C:\LabSolutions\Data\Analiz\derya\BPS-3\_160.lcd

| Elmt | Val | Min | Max | Use Adduct |
|------|-----|-----|-----|------|-----|-----|-----|------|-----|-----|-----|------|-----|-----|-----|------------|
| H    | 1   | 10  | 40  | O    | 2   | 0   | 5   | S    | 2   | 0   | 2   | Ru   | 2   | 0   | 0   | H          |
| C    | 4   | 10  | 40  | F    | 1   | 0   | 0   | Cl   | 1   | 0   | 0   | Pd   | 2   | 0   | 0   |            |
| N    | 3   | 0   | 5   | P    | 3   | 0   | 0   | Br   | 1   | 0   | 0   | I    | 3   | 0   | 0   |            |

Error Margin (ppm): 5  
 HC Ratio: unlimited  
 Max Isotopes: 3  
 MSn Iso RI (%): 10.00

DBE Range: 5.0 - 15.0  
 Apply N Rule: yes  
 Isotope RI (%): 1.00  
 MSn Logic Mode: AND

Electron Ions: both  
 Use MSn Info: yes  
 Isotope Res: 9000  
 Max Results: 150

Event#: 1 MS(E+) Ret. Time : 2.000 -> 2.480 Scan# : 301 -> 373

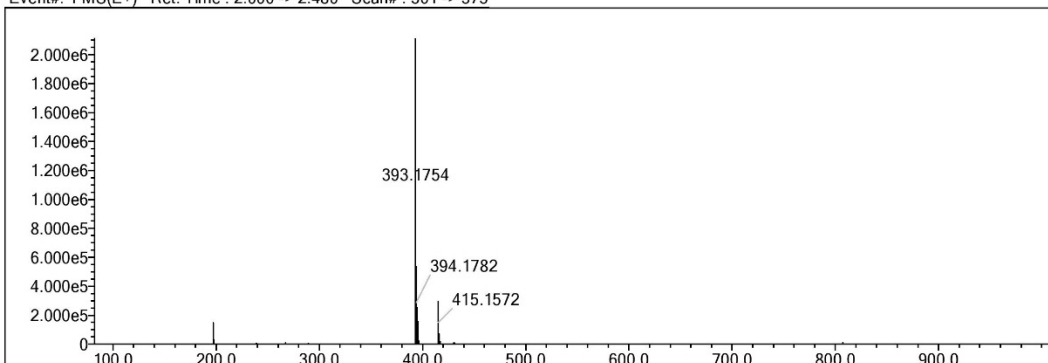

Measured region for 393.1754 m/z

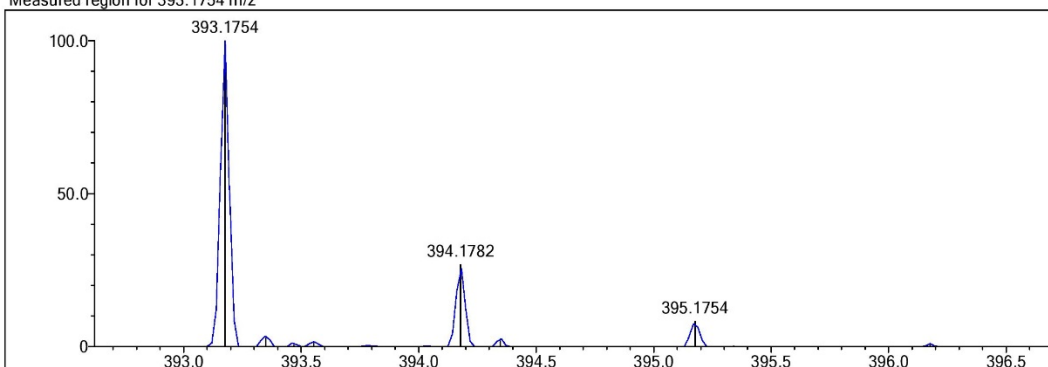

C22 H24 N4 O S [M+H]<sup>+</sup> : Predicted region for 393.1744 m/z

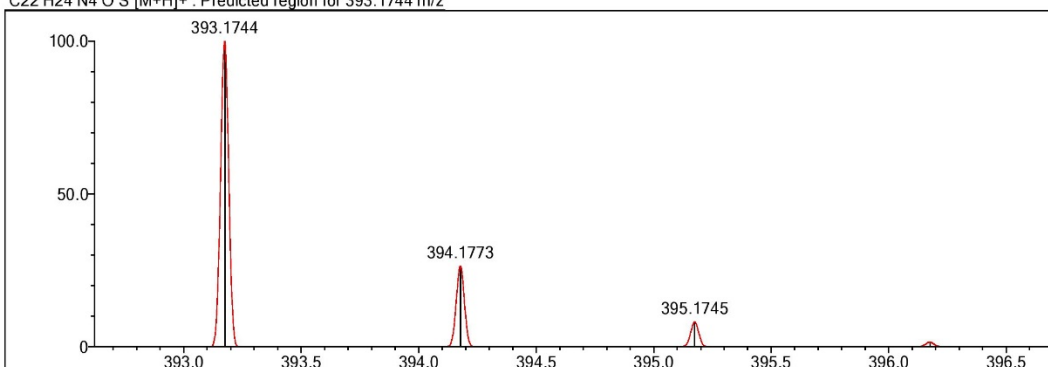

| Rank | Score | Formula (M)    | Ion                | Meas. m/z | Pred. m/z | Df. (mDa) | Df. (ppm) | Iso   | DBE  |
|------|-------|----------------|--------------------|-----------|-----------|-----------|-----------|-------|------|
| 1    | 89.53 | C22 H24 N4 O S | [M+H] <sup>+</sup> | 393.1754  | 393.1744  | 1.0       | 2.54      | 93.12 | 13.0 |

Figure S17. HRMS spectra of compounds 4c

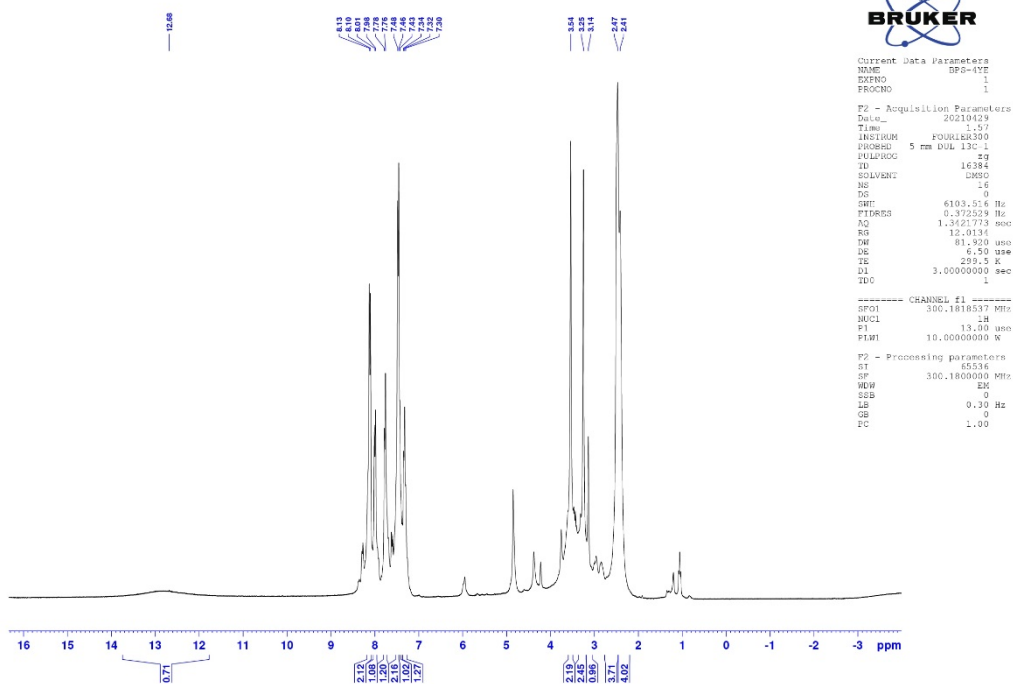

Figure S18. <sup>1</sup>H-NMR spectra of compounds 4d

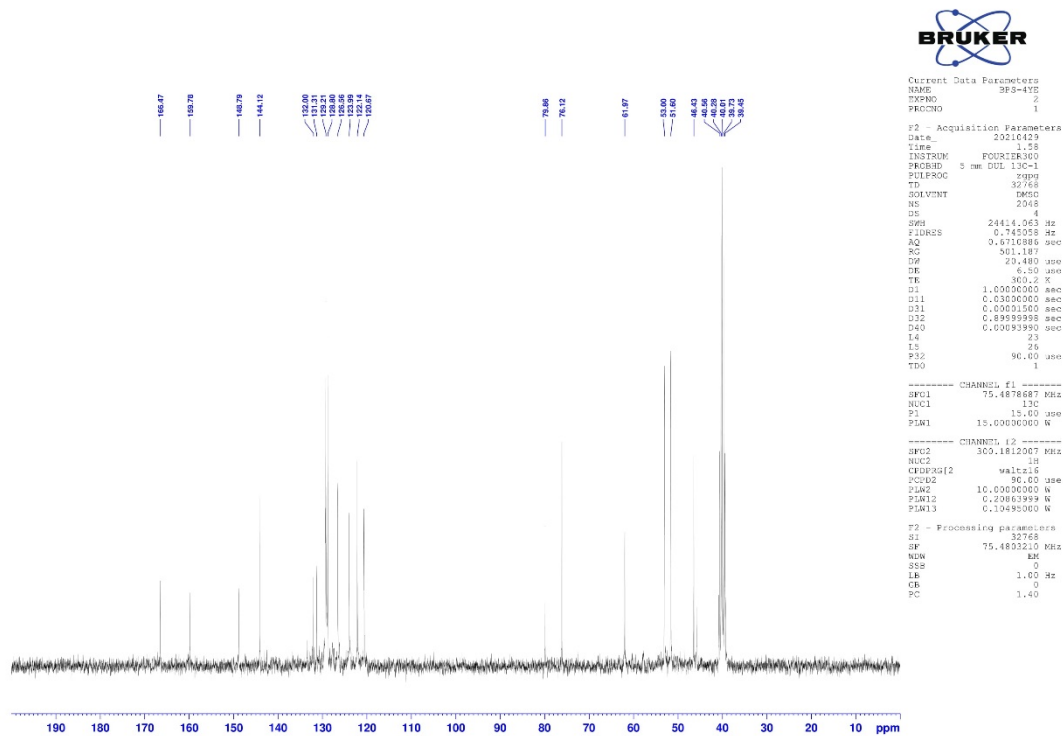

Figure S19. <sup>13</sup>C-NMR spectra of compounds 4d



Data File: C:\LabSolutions\Data\Analiz\derya\BPS-4\_161.lcd

| Elmt | Val. | Min | Max | Use Adduct |
|------|------|-----|-----|------|------|-----|-----|------|------|-----|-----|------|------|-----|-----|------------|
| H    | 1    | 10  | 40  | O    | 2    | 0   | 5   | S    | 2    | 0   | 2   | Ru   | 2    | 0   | 0   | H          |
| C    | 4    | 10  | 40  | F    | 1    | 0   | 0   | Cl   | 1    | 0   | 0   | Pd   | 2    | 0   | 0   |            |
| N    | 3    | 1   | 5   | P    | 3    | 0   | 0   | Br   | 1    | 0   | 0   | I    | 3    | 0   | 0   |            |

Error Margin (ppm): 5  
 HC Ratio: unlimited  
 Max Isotopes: 3  
 MSn Iso RI (%): 10.00

DBE Range: 5.0 - 15.0  
 Apply N Rule: yes  
 Isotope RI (%): 1.00  
 MSn Logic Mode: AND

Electron Ions: both  
 Use MSn Info: yes  
 Isotope Res: 9000  
 Max Results: 150

Event#: 1 MS(E+) Ret. Time : 1.893 Scan# : 285

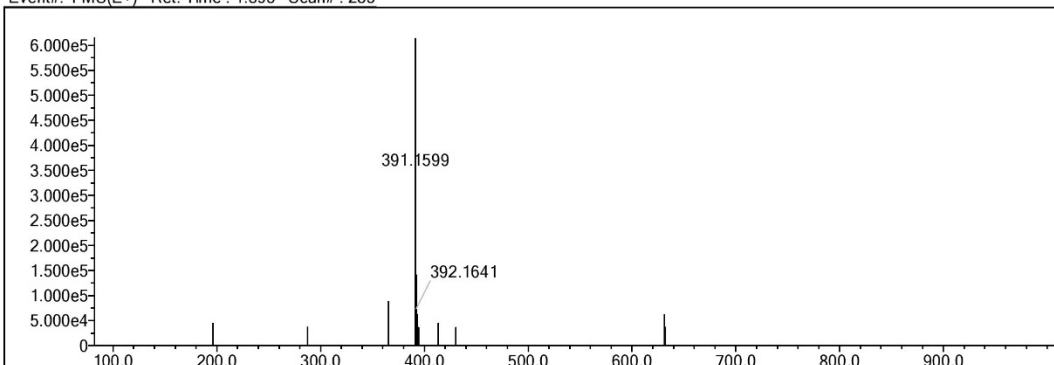

Measured region for 391.1599 m/z

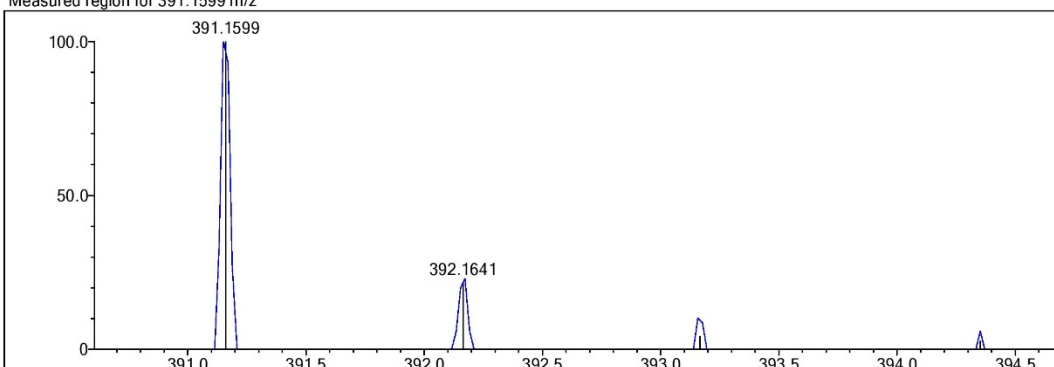

C22H22N4OS [M+H]<sup>+</sup>: Predicted region for 391.1587 m/z

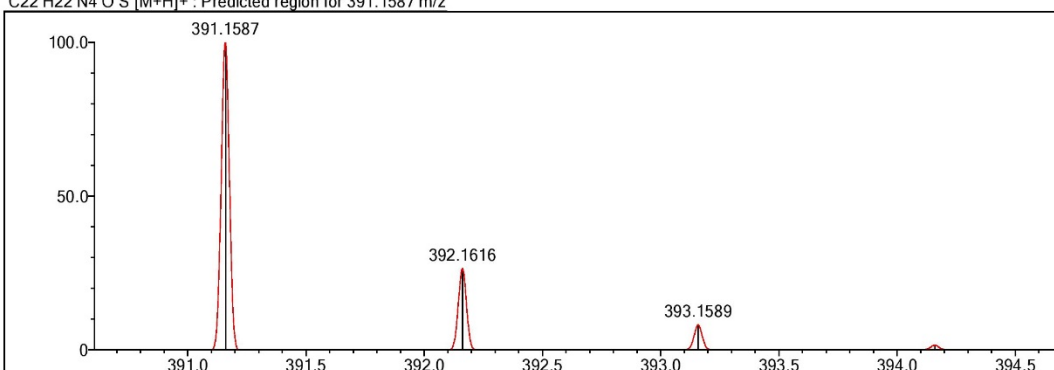

| Rank | Score | Formula (M) | Ion                | Meas. m/z | Pred. m/z | Df. (mDa) | Df. (ppm) | Iso   | DBE  |
|------|-------|-------------|--------------------|-----------|-----------|-----------|-----------|-------|------|
| 1    | 62.15 | C22H22N4OS  | [M+H] <sup>+</sup> | 391.1599  | 391.1587  | 1.2       | 3.07      | 65.54 | 14.0 |

Figure S20. HRMS spectra of compounds 4d

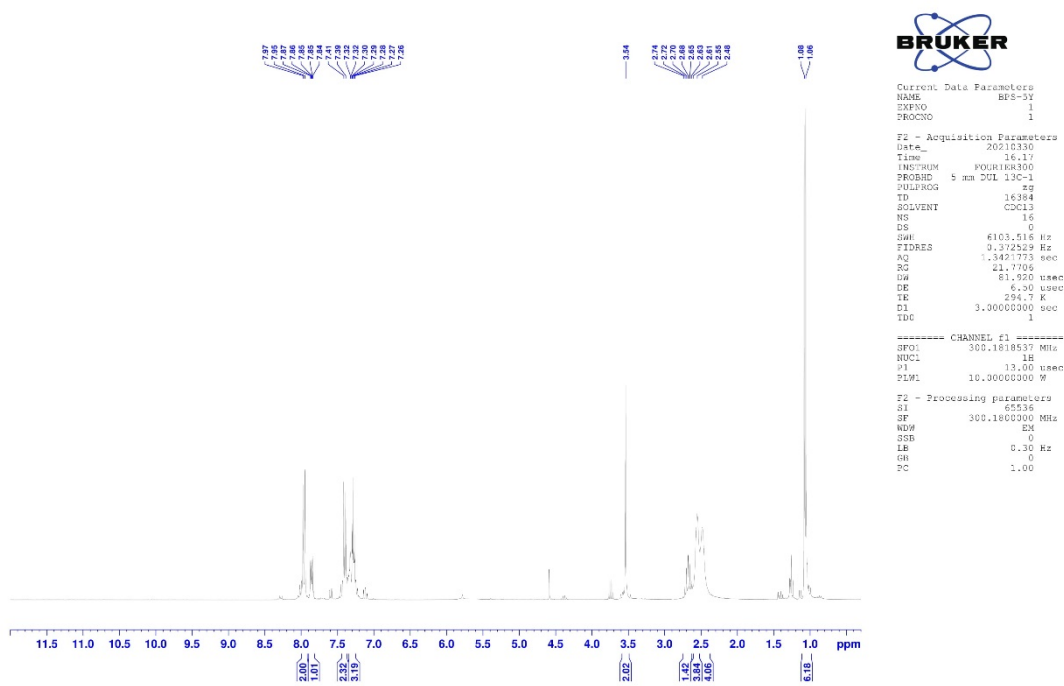

Figure S21. <sup>1</sup>H-NMR spectra of compounds 4e

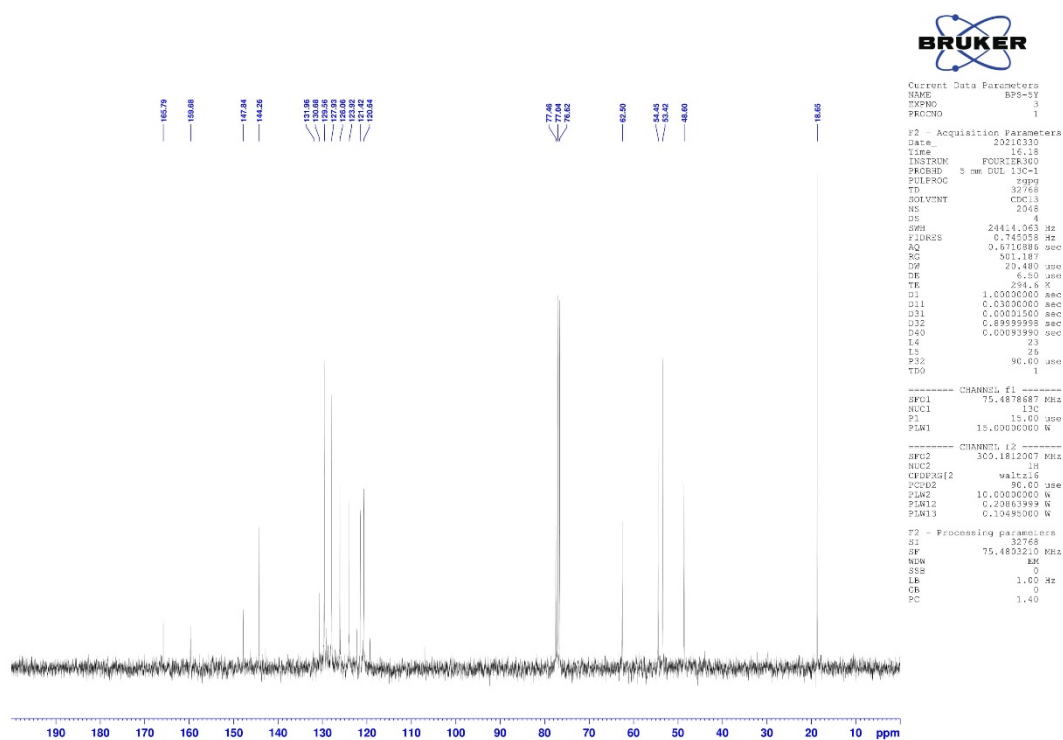

Figure S22. <sup>13</sup>C-NMR spectra of compounds 4e

Data File: C:\LabSolutions\Data\Analiz\deryal\BPS-5\_162.lcd

| Elmt | Val. | Min | Max | Use Adduct |
|------|------|-----|-----|------|------|-----|-----|------|------|-----|-----|------|------|-----|-----|------------|
| H    | 1    | 10  | 40  | O    | 2    | 0   | 5   | S    | 2    | 0   | 2   | Ru   | 2    | 0   | 0   | H          |
| C    | 4    | 10  | 40  | F    | 1    | 0   | 0   | Cl   | 1    | 0   | 0   | Pd   | 2    | 0   | 0   |            |
| N    | 3    | 1   | 5   | P    | 3    | 0   | 0   | Br   | 1    | 0   | 0   | I    | 3    | 0   | 0   |            |

Error Margin (ppm): 5

DBE Range: 5.0 - 15.0

Electron Ions: both

HC Ratio: unlimited

Apply N Rule: yes

Use MSn Info: yes

Max Isotopes: 3

Isotope RI (%): 1.00

Isotope Res: 9000

MSn Iso RI (%): 10.00

MSn Logic Mode: AND

Max Results: 150

Event#: 1 MS(E+) Ret. Time : 1.987 -&gt; 2.493 Scan# : 299 -&gt; 375

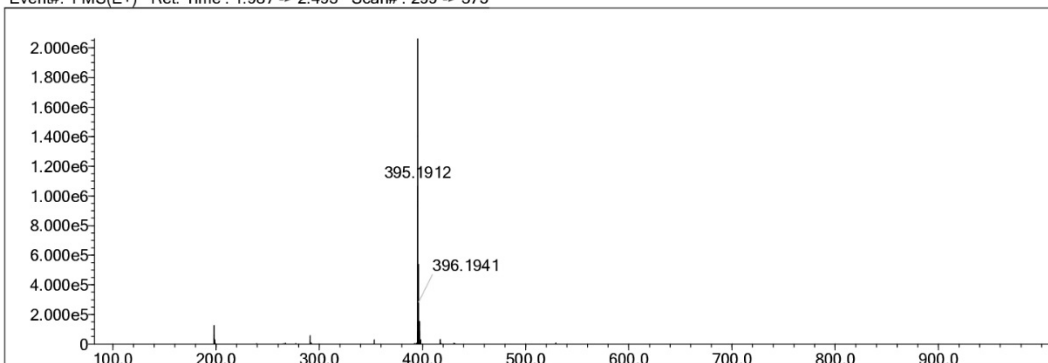

Measured region for 395.1912 m/z

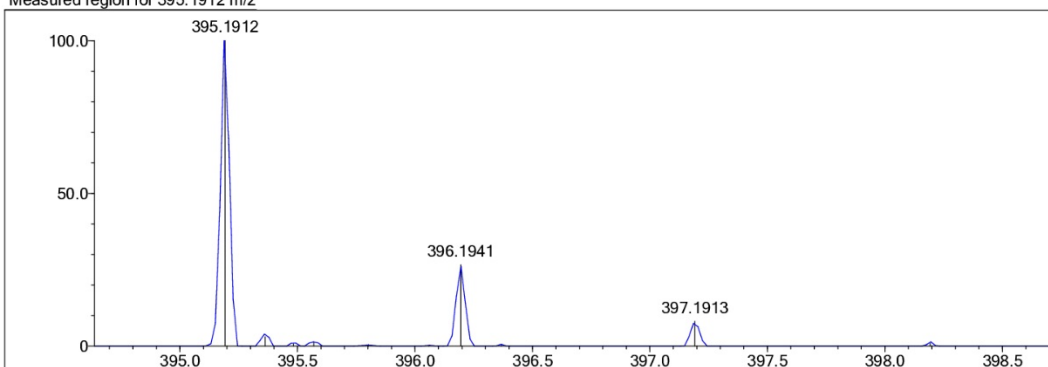

C22 H26 N4 O S [M+H]+ : Predicted region for 395.1900 m/z

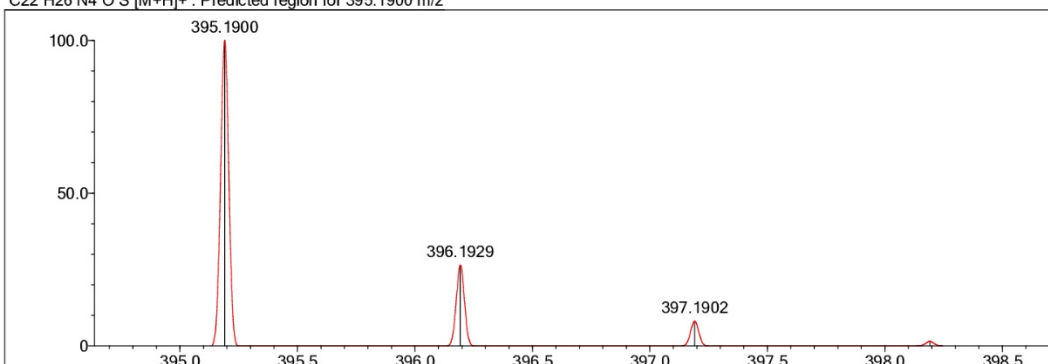

| Rank | Score | Formula (M)    | Ion    | Meas. m/z | Pred. m/z | Df. (mDa) | Df. (ppm) | Iso    | DBE  |
|------|-------|----------------|--------|-----------|-----------|-----------|-----------|--------|------|
| 1    | 94.90 | C22 H26 N4 O S | [M+H]+ | 395.1912  | 395.1900  | 1.2       | 3.04      | 100.00 | 12.0 |

Figure S23. HRMS spectra of compounds 4e

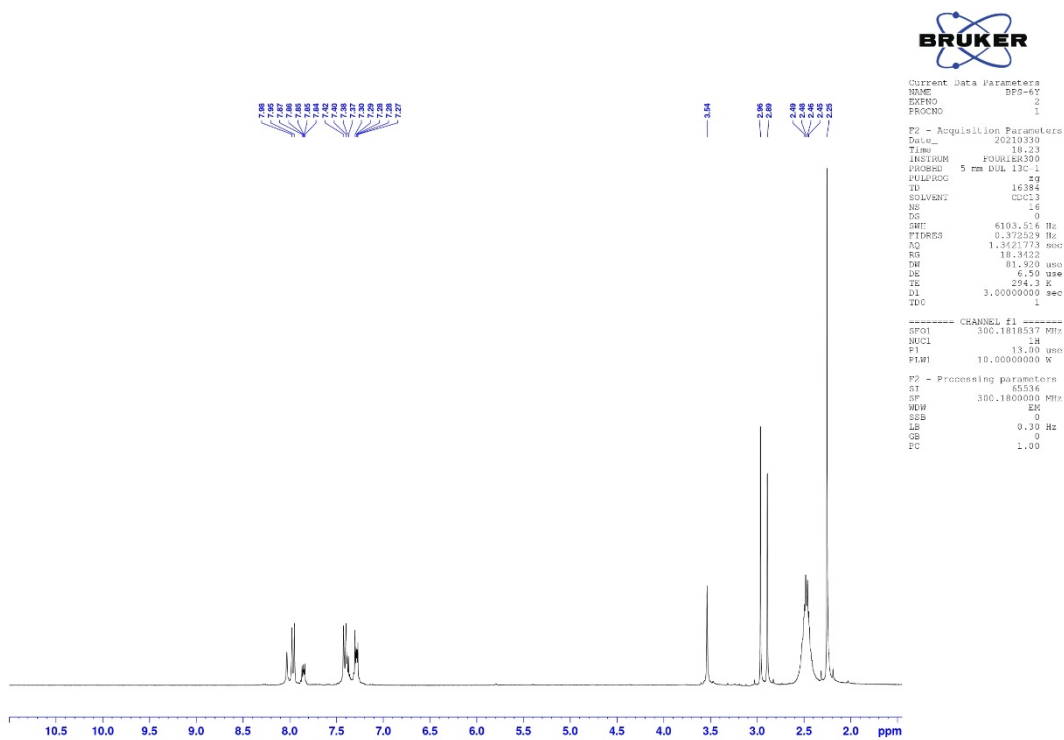

Figure S24. <sup>1</sup>H-NMR spectra of compounds 4f

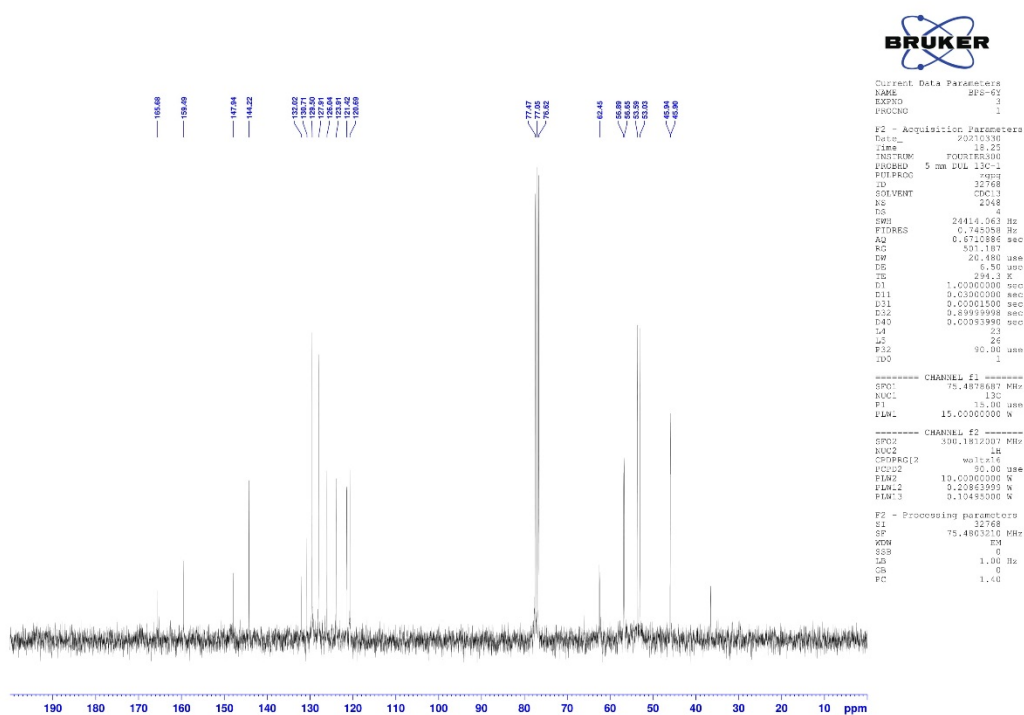

Figure S25. <sup>13</sup>C-NMR spectra of compounds 4f

Data File: C:\LabSolutions\Data\Analiz\dera\BPS-6\_163.lcd

| Elmt | Val. | Min | Max | Use Adduct |
|------|------|-----|-----|------|------|-----|-----|------|------|-----|-----|------|------|-----|-----|------------|
| H    | 1    | 10  | 40  | O    | 2    | 0   | 5   | S    | 2    | 0   | 2   | Ru   | 2    | 0   | 0   | H          |
| C    | 4    | 10  | 40  | F    | 1    | 0   | 0   | Cl   | 1    | 0   | 0   | Pd   | 2    | 0   | 0   |            |
| N    | 3    | 2   | 5   | P    | 3    | 0   | 0   | Br   | 1    | 0   | 0   | I    | 3    | 0   | 0   |            |

Error Margin (ppm): 5  
 HC Ratio: unlimited  
 Max Isotopes: 3  
 MSn Iso RI (%): 10.00

DBE Range: 5.0 - 15.0  
 Apply N Rule: yes  
 Isotope RI (%): 1.00  
 MSn Logic Mode: AND

Electron Ions: both  
 Use MSn Info: yes  
 Isotope Res: 9000  
 Max Results: 150

Event#: 1 MS(E+) Ret. Time : 1.947 Scan#: 293

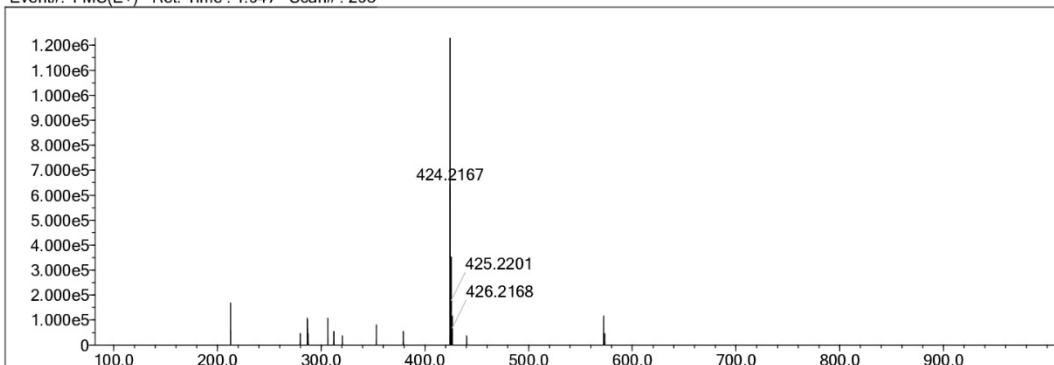

Measured region for 424.2167 m/z

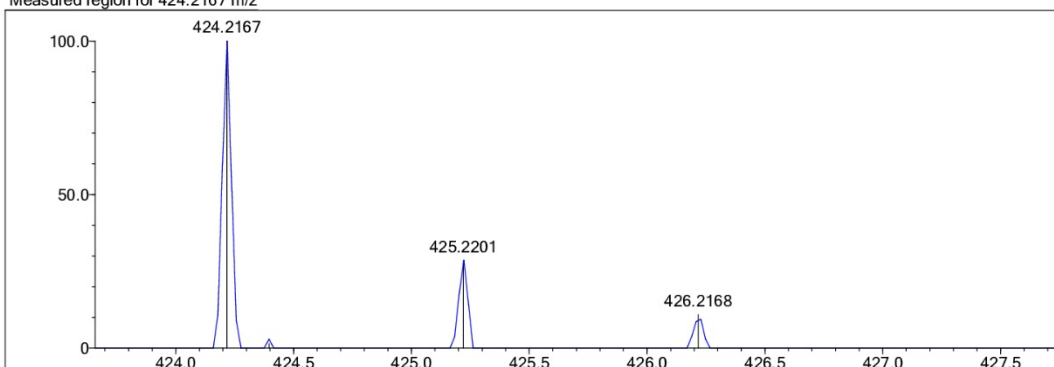

C23 H29 N5 O S [M+H]+ : Predicted region for 424.2166 m/z

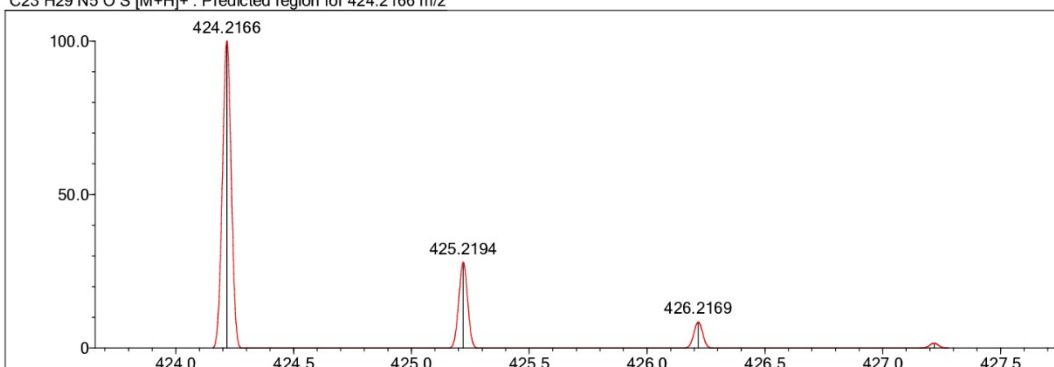

| Rank | Score | Formula (M)    | Ion    | Meas. m/z | Pred. m/z | Df. (mDa) | Df. (ppm) | Iso   | DBE  |
|------|-------|----------------|--------|-----------|-----------|-----------|-----------|-------|------|
| 1    | 98.87 | C23 H29 N5 O S | [M+H]+ | 424.2167  | 424.2166  | 0.1       | 0.24      | 98.87 | 12.0 |

Figure S26. HRMS spectra of compounds 4f

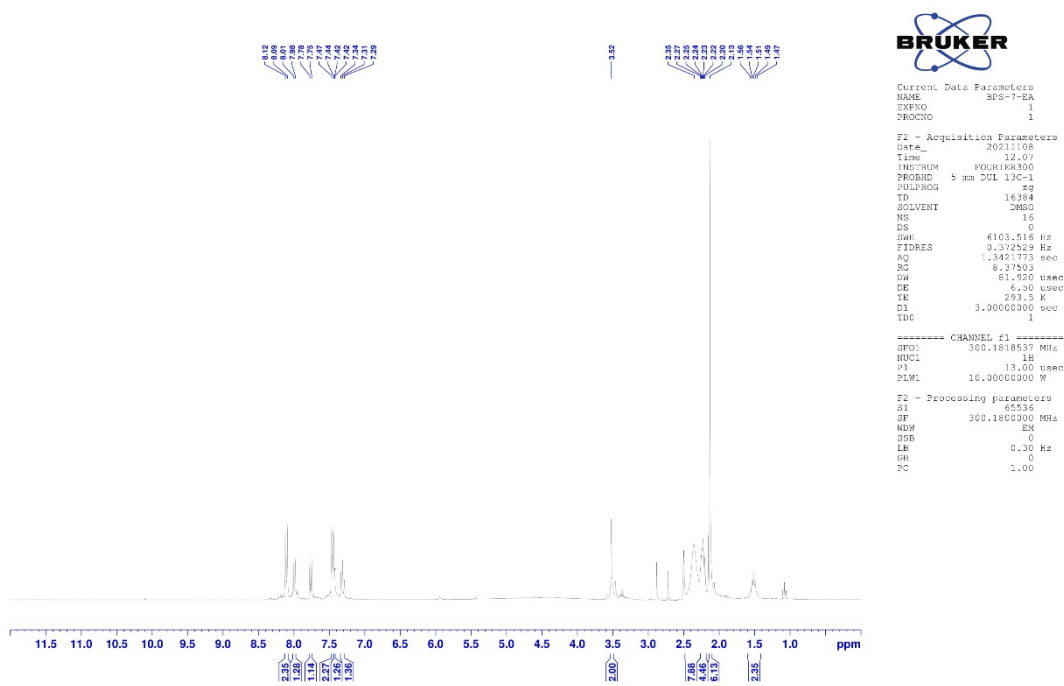

Figure S27. <sup>1</sup>H-NMR spectra of compounds **4g**

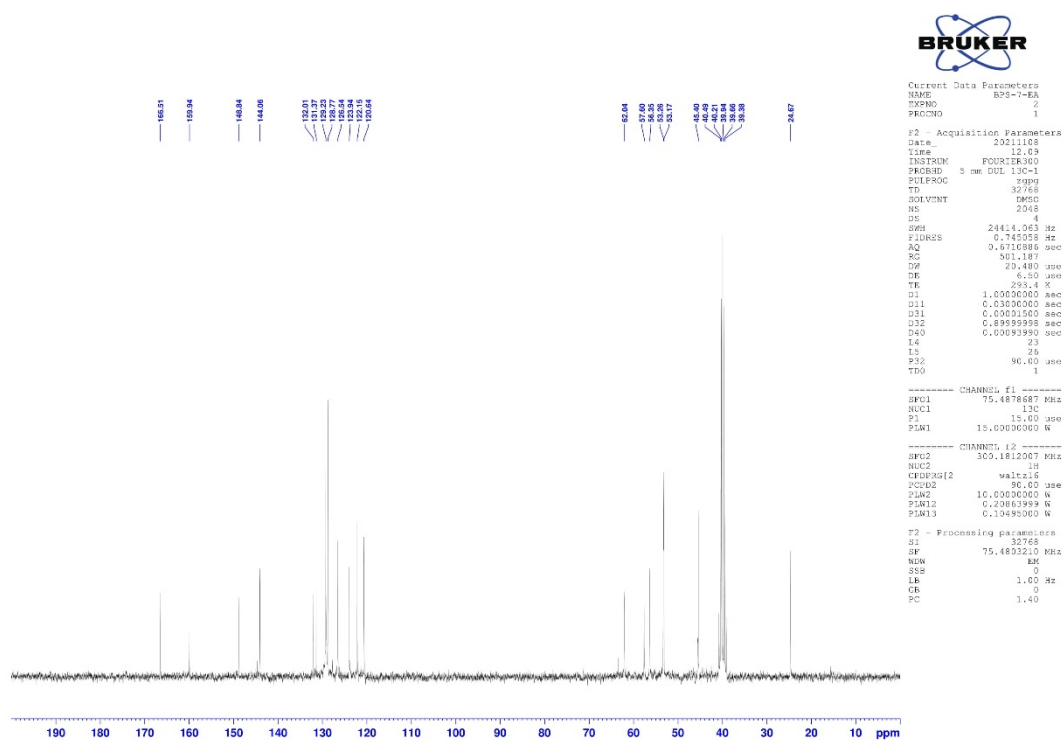

Figure S28. <sup>13</sup>C-NMR spectra of compounds **4g**

Data File: C:\LabSolutions\Data\Analiz\derya\BPS-7\_164.lcd

| Elmt | Val. | Min | Max | Use Adduct |
|------|------|-----|-----|------|------|-----|-----|------|------|-----|-----|------|------|-----|-----|------------|
| H    | 1    | 10  | 40  | O    | 2    | 0   | 5   | S    | 2    | 0   | 2   | Ru   | 2    | 0   | 0   | H          |
| C    | 4    | 10  | 40  | F    | 1    | 0   | 0   | Cl   | 1    | 0   | 0   | Pd   | 2    | 0   | 0   |            |
| N    | 3    | 2   | 5   | P    | 3    | 0   | 0   | Br   | 1    | 0   | 0   | I    | 3    | 0   | 0   |            |

Error Margin (ppm): 5  
 HC Ratio: unlimited  
 Max Isotopes: 3  
 MSn Iso RI (%): 10.00

DBE Range: 5.0 - 15.0  
 Apply N Rule: yes  
 Isotope RI (%): 1.00  
 MSn Logic Mode: AND

Electron Ions: both  
 Use MSn Info: yes  
 Isotope Res: 9000  
 Max Results: 150

Event#: 1 MS(E+) Ret. Time : 1.640 -> 2.307 Scan#: 247 -> 347

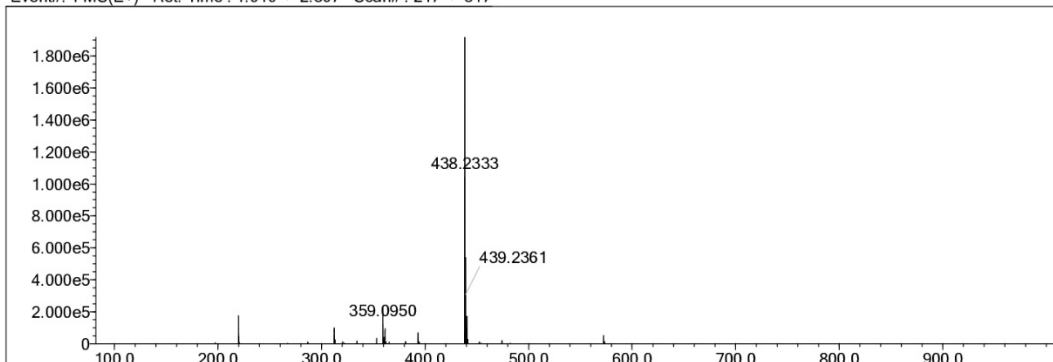

Measured region for 438.2333 m/z

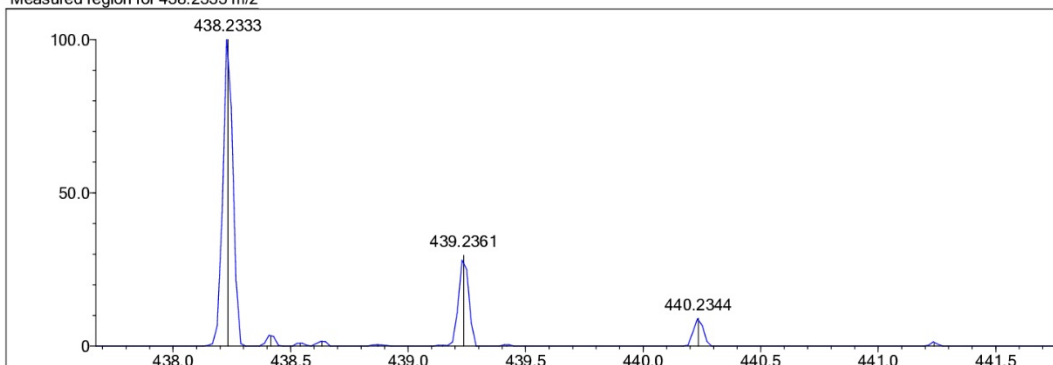

C24 H31 N5 O S [M+H]<sup>+</sup> : Predicted region for 438.2322 m/z

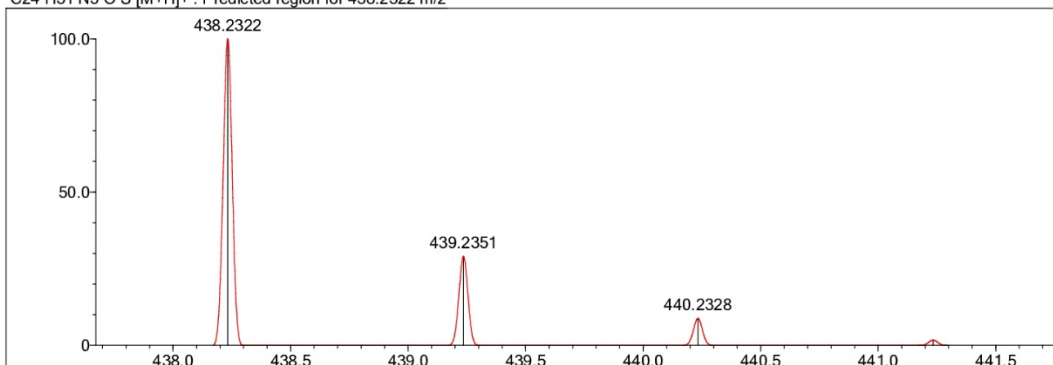

| Rank | Score | Formula (M)    | Ion                | Meas. m/z | Pred. m/z | Df. (mDa) | Df. (ppm) | Iso   | DBE  |
|------|-------|----------------|--------------------|-----------|-----------|-----------|-----------|-------|------|
| 1    | 91.64 | C24 H31 N5 O S | [M+H] <sup>+</sup> | 438.2333  | 438.2322  | 1.1       | 2.51      | 95.23 | 12.0 |

Figure S29. HRMS spectra of compounds 4g

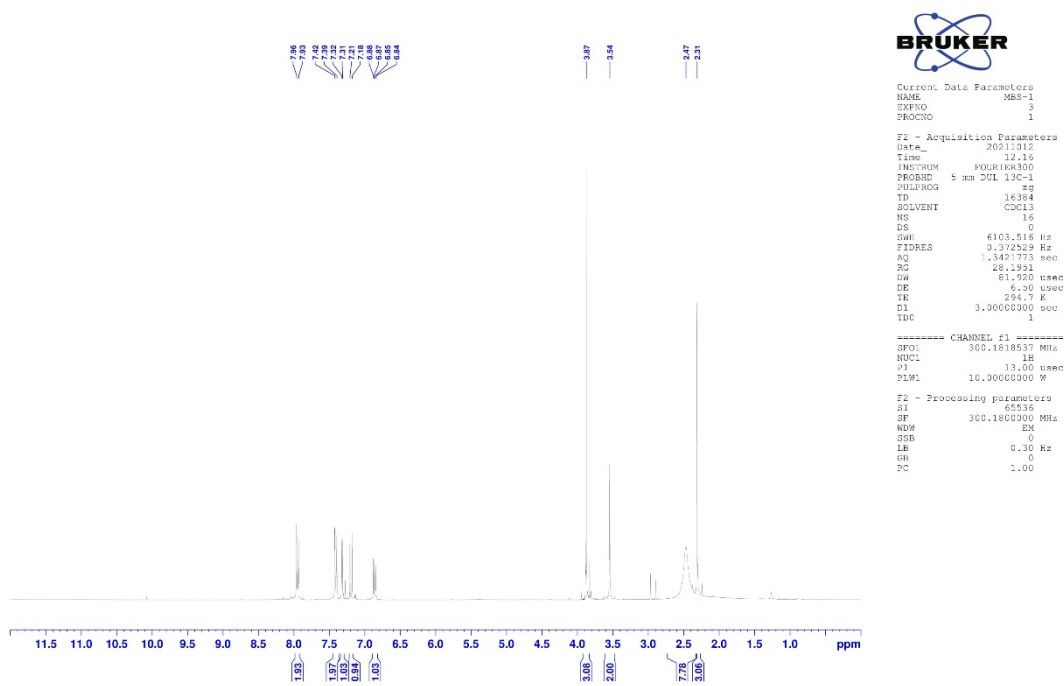

Figure S30. <sup>1</sup>H-NMR spectra of compounds 4h

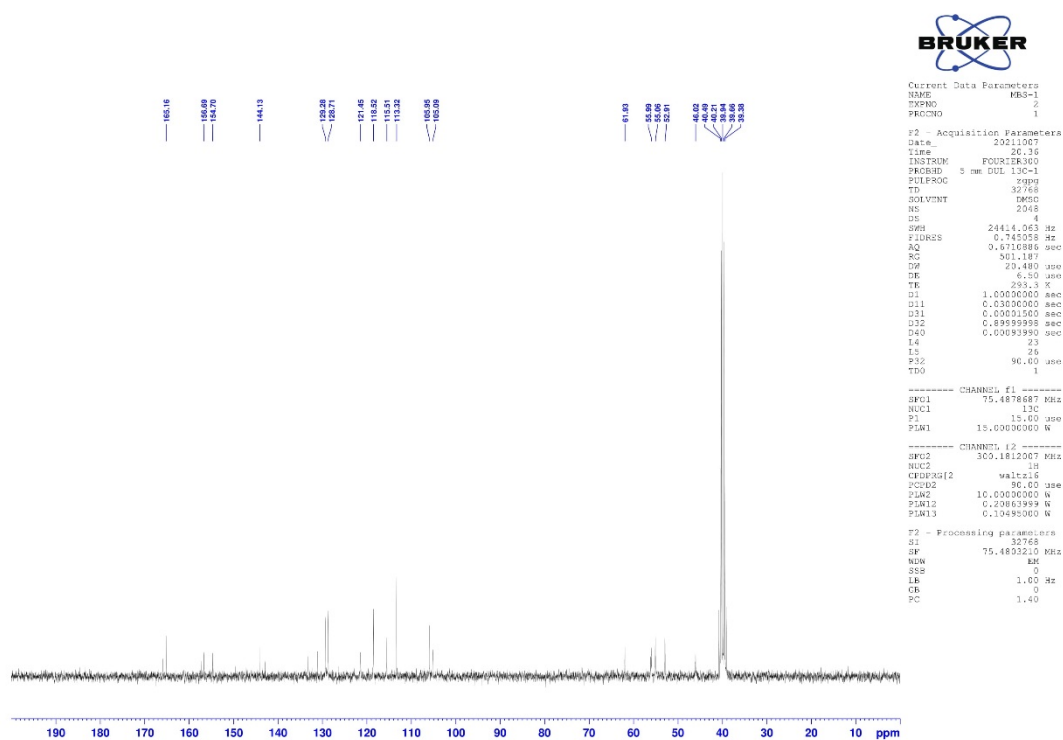

Figure S31. <sup>13</sup>C-NMR spectra of compounds 4h



Data File: C:\LabSolutions\Data\Analiz\derya\MBS-1\_166.lcd

| Elmt | Val. | Min | Max | Use Adduct |
|------|------|-----|-----|------|------|-----|-----|------|------|-----|-----|------|------|-----|-----|------------|
| H    | 1    | 10  | 40  | O    | 2    | 0   | 5   | S    | 2    | 0   | 1   | Ru   | 2    | 0   | 0   | H          |
| C    | 4    | 10  | 40  | F    | 1    | 0   | 0   | Cl   | 1    | 0   | 0   | Pd   | 2    | 0   | 0   |            |
| N    | 3    | 2   | 5   | P    | 3    | 0   | 0   | Br   | 1    | 0   | 0   | I    | 3    | 0   | 0   |            |

Error Margin (ppm): 5

DBE Range: 5.0 - 15.0

Electron Ions: both

HC Ratio: unlimited

Apply N Rule: yes

Use MSn Info: yes

Max Isotopes: 3

Isotope RI (%): 1.00

Isotope Res: 9000

MSn Iso RI (%): 10.00

MSn Logic Mode: AND

Max Results: 150

Event#: 1 MS(E+) Ret. Time : 1.853 -&gt; 2.413 Scan#: 279 -&gt; 363

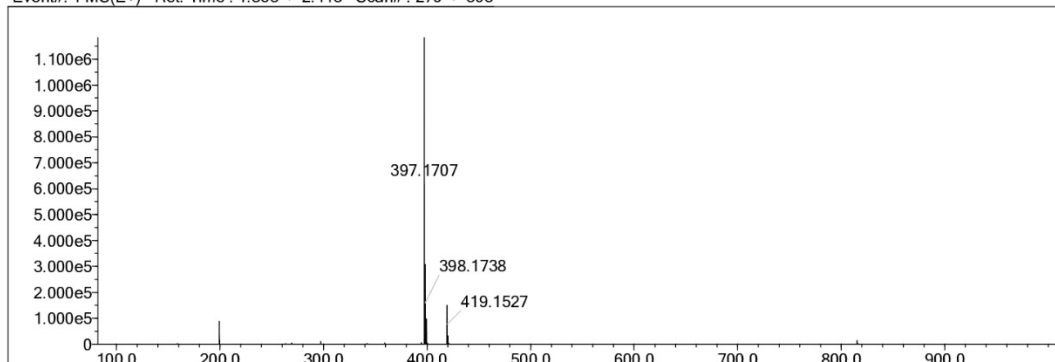

Measured region for 397.1707 m/z

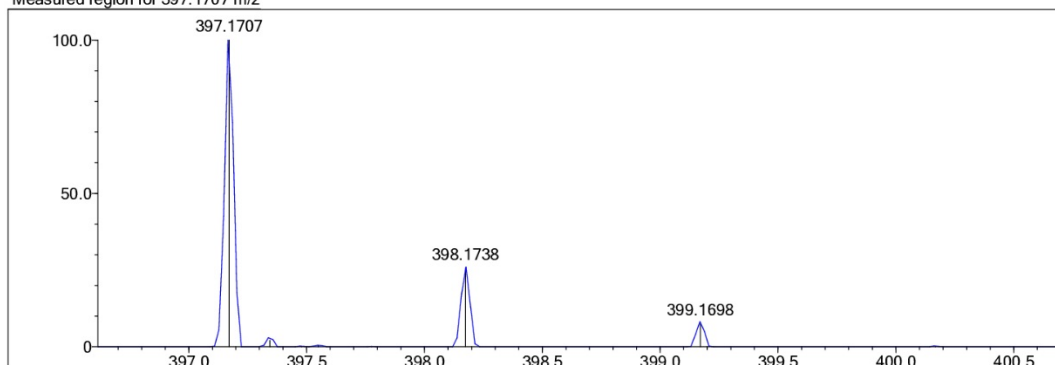C21 H24 N4 O2 S [M+H]<sup>+</sup> : Predicted region for 397.1693 m/z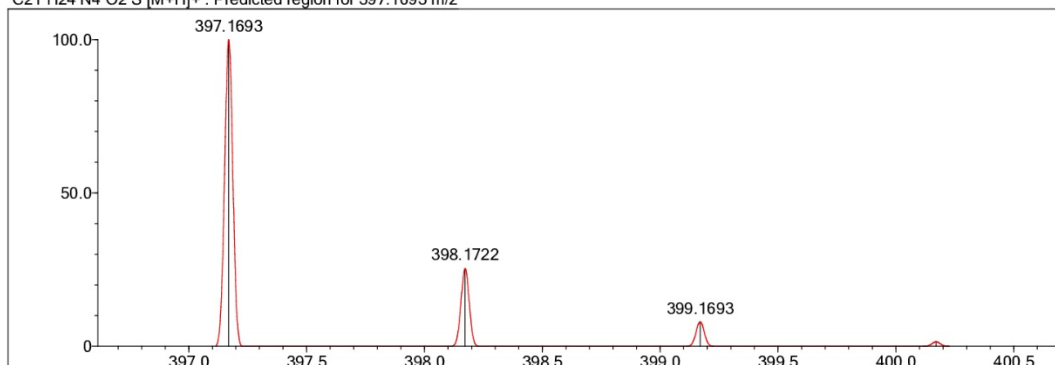

| Rank | Score | Formula (M)     | Ion                | Meas. m/z | Pred. m/z | Df. (mDa) | Df. (ppm) | Iso   | DBE  |
|------|-------|-----------------|--------------------|-----------|-----------|-----------|-----------|-------|------|
| 1    | 79.91 | C21 H24 N4 O2 S | [M+H] <sup>+</sup> | 397.1707  | 397.1693  | 1.4       | 3.52      | 85.29 | 12.0 |

Figure S32. HRMS spectra of compounds 4h

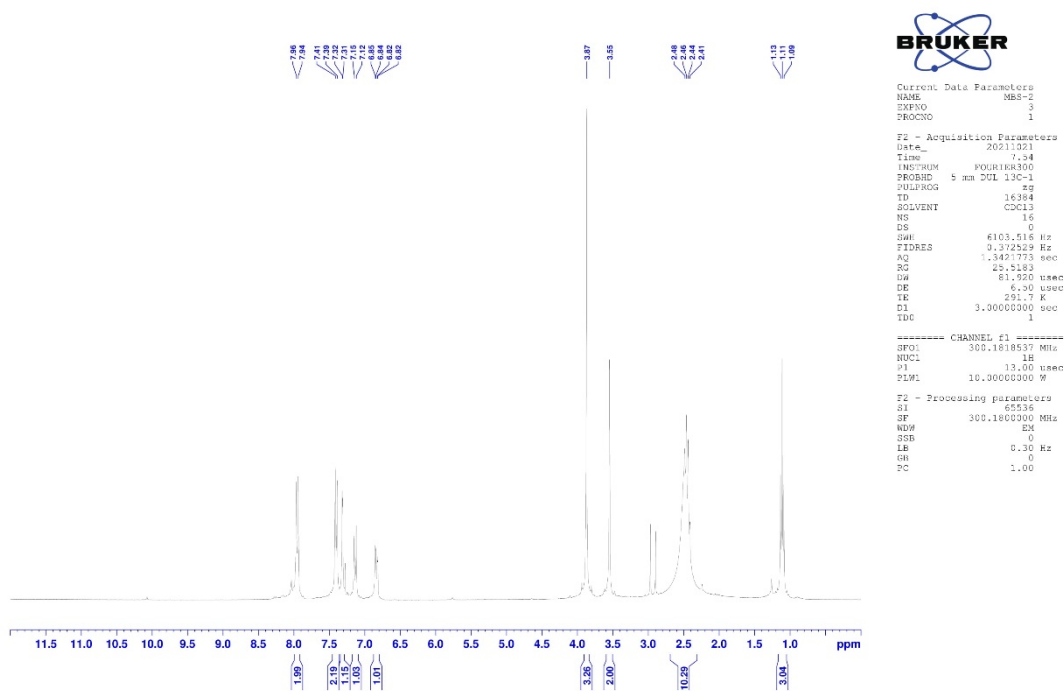

Figure S33. <sup>1</sup>H-NMR spectra of compounds 4i

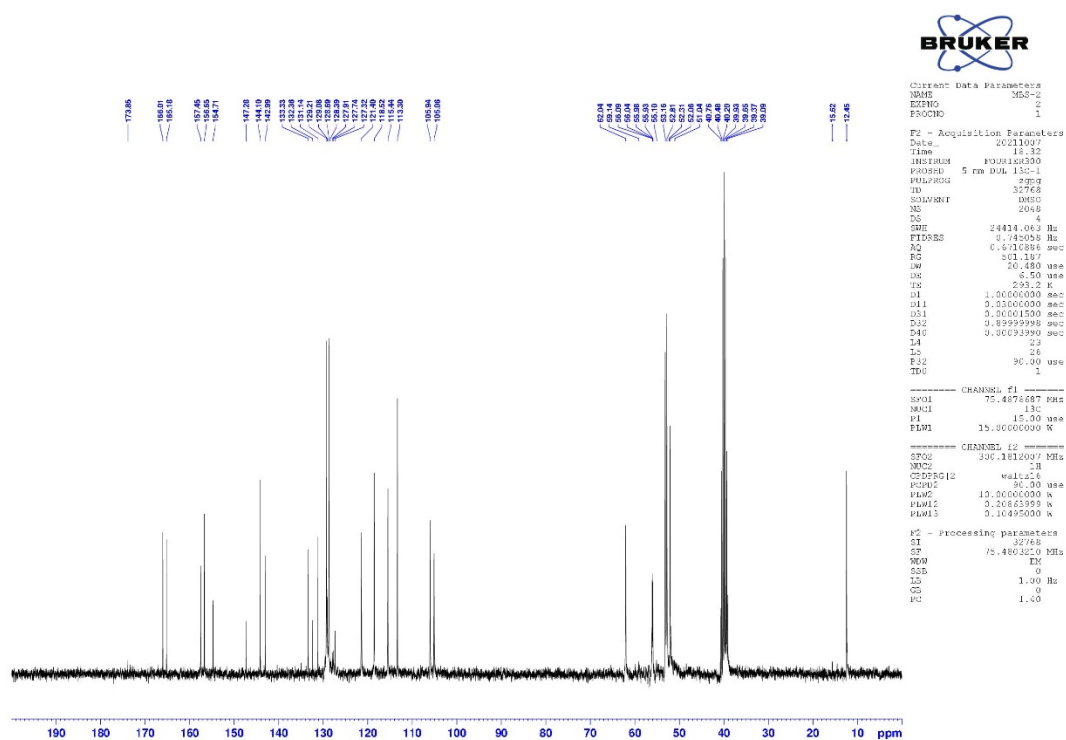

Figure S34. <sup>13</sup>C-NMR spectra of compounds 4i

Data File: C:\LabSolutions\Data\Analyze\dera\MBS-2\_167.lcd

| Elmt | Val. | Min | Max | Use Adduct |
|------|------|-----|-----|------|------|-----|-----|------|------|-----|-----|------|------|-----|-----|------------|
| H    | 1    | 10  | 40  | O    | 2    | 0   | 5   | S    | 2    | 0   | 1   | Ru   | 2    | 0   | 0   | H          |
| C    | 4    | 10  | 40  | F    | 1    | 0   | 0   | Cl   | 1    | 0   | 0   | Pd   | 2    | 0   | 0   |            |
| N    | 3    | 2   | 5   | P    | 3    | 0   | 0   | Br   | 1    | 0   | 0   | I    | 3    | 0   | 0   |            |

Error Margin (ppm): 5  
 DBE Range: 5.0 - 15.0  
 Electron Ions: both  
 HC Ratio: unlimited  
 Apply N Rule: yes  
 Use MSn Info: yes  
 Max Isotopes: 3  
 Isotope RI (%): 1.00  
 MSn Iso RI (%): 10.00  
 MSn Logic Mode: AND  
 Max Results: 150

Event#: 1 MS(E+) Ret. Time : 2.147 Scan# : 323

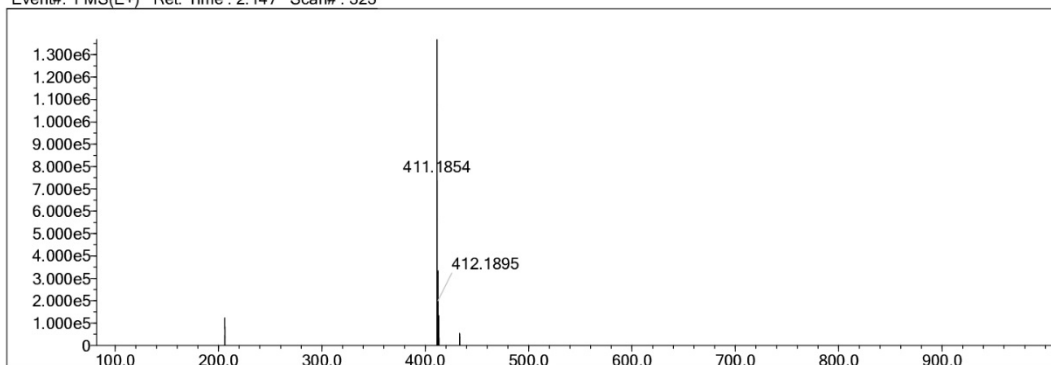

Measured region for 411.1854 m/z

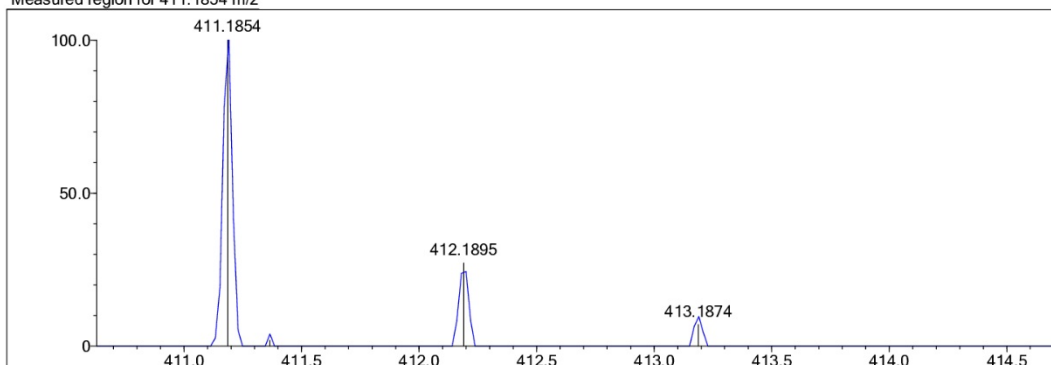

C22 H26 N4 O2 S [M+H]<sup>+</sup> : Predicted region for 411.1849 m/z

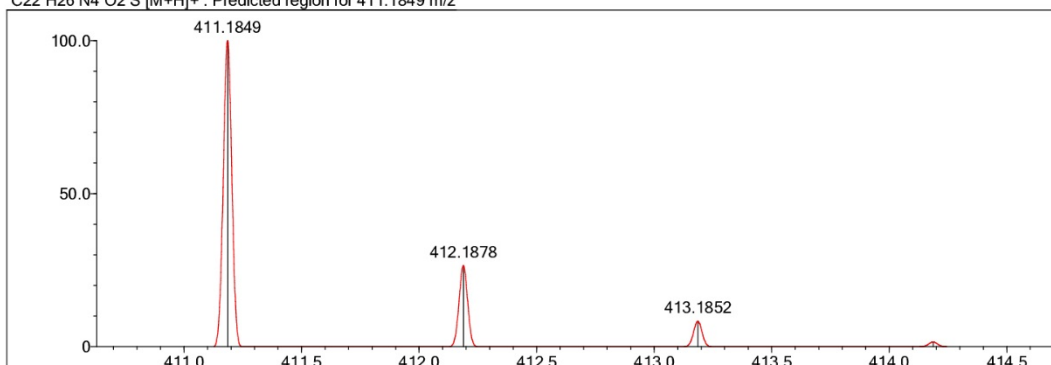

| Rank | Score | Formula (M)     | Ion                | Meas. m/z | Pred. m/z | Df. (mDa) | Df. (ppm) | Iso   | DBE  |
|------|-------|-----------------|--------------------|-----------|-----------|-----------|-----------|-------|------|
| 1    | 79.48 | C22 H26 N4 O2 S | [M+H] <sup>+</sup> | 411.1854  | 411.1849  | 0.5       | 1.22      | 79.91 | 12.0 |

Figure S35. HRMS spectra of compounds 4i

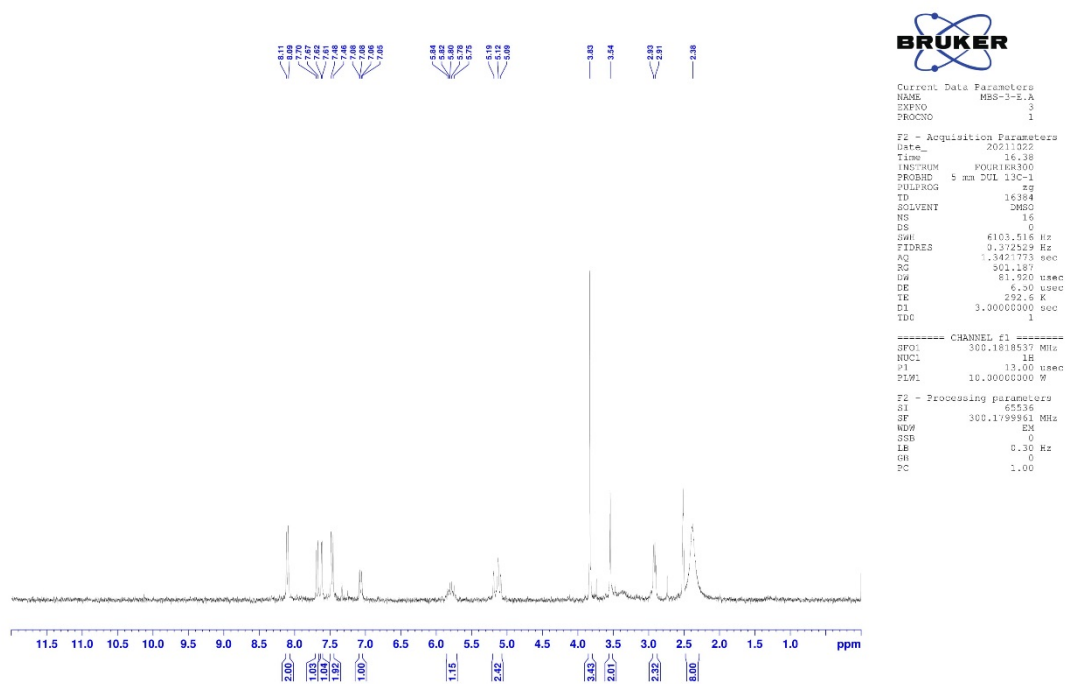

Figure S36. <sup>1</sup>H-NMR spectra of compounds 4j

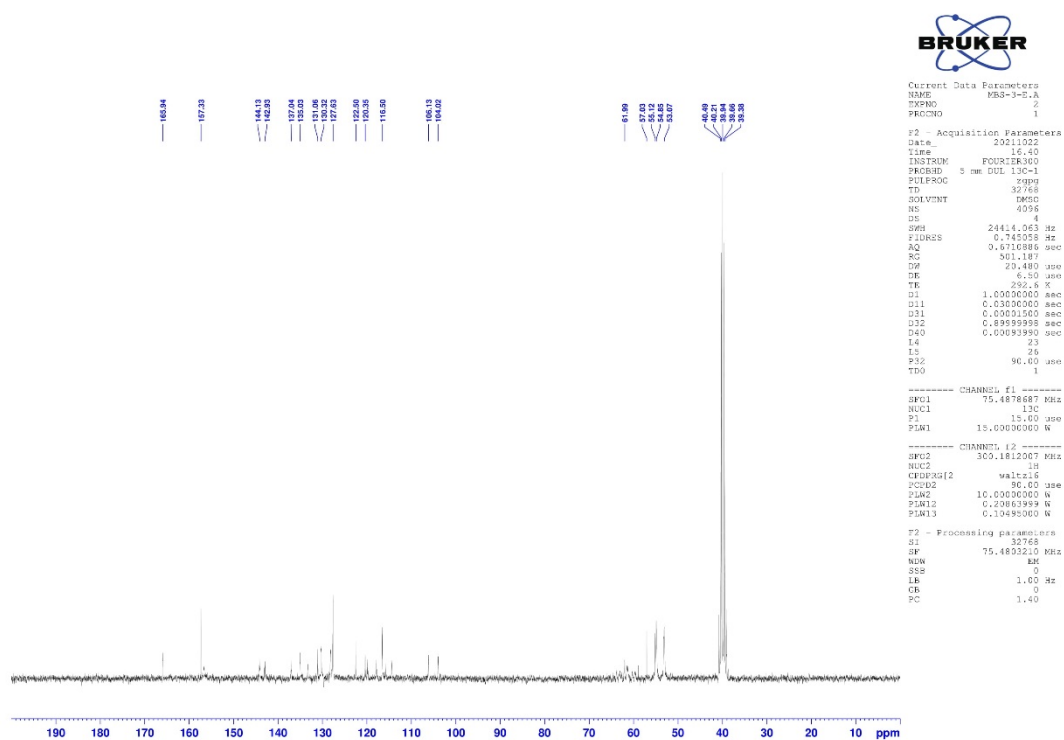

Figure S37. <sup>13</sup>C-NMR spectra of compounds 4j

Data File: C:\LabSolutions\Data\Analiz\derya\MBS-3\_168.lcd

| Elmt | Val. | Min | Max | Use Adduct |
|------|------|-----|-----|------|------|-----|-----|------|------|-----|-----|------|------|-----|-----|------------|
| H    | 1    | 10  | 40  | O    | 2    | 0   | 5   | S    | 2    | 0   | 1   | Ru   | 2    | 0   | 0   | H          |
| C    | 4    | 10  | 40  | F    | 1    | 0   | 0   | Cl   | 1    | 0   | 0   | Pd   | 2    | 0   | 0   |            |
| N    | 3    | 2   | 5   | P    | 3    | 0   | 0   | Br   | 1    | 0   | 0   | I    | 3    | 0   | 0   |            |

Error Margin (ppm): 5  
 HC Ratio: unlimited  
 Max Isotopes: 3  
 MSn Iso RI (%): 10.00

DBE Range: 5.0 - 15.0  
 Apply N Rule: yes  
 Isotope RI (%): 1.00  
 MSn Logic Mode: AND

Electron Ions: both  
 Use MSn Info: yes  
 Isotope Res: 9000  
 Max Results: 150

Event#: 1 MS(E+) Ret. Time : 2.107 Scan# : 317

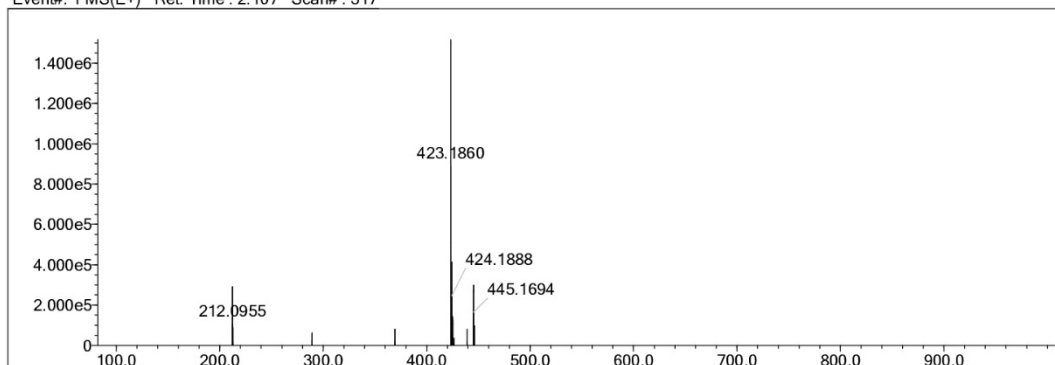

Measured region for 423.1860 m/z

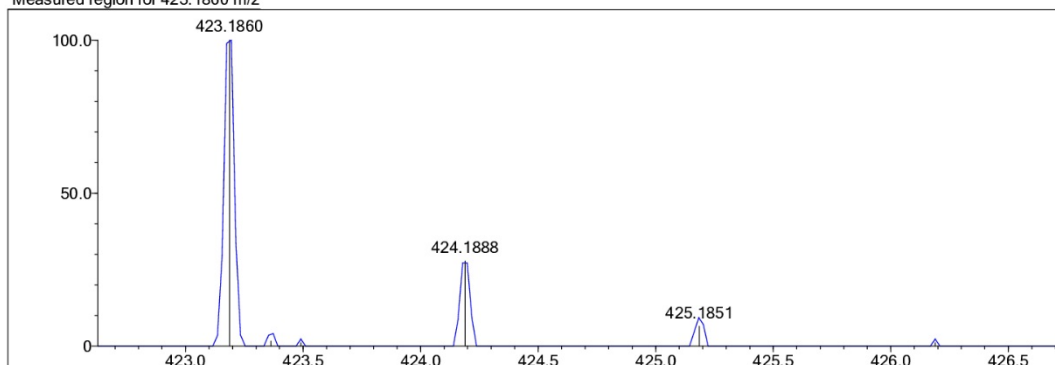

C23 H26 N4 O2 S [M+H]<sup>+</sup> : Predicted region for 423.1849 m/z

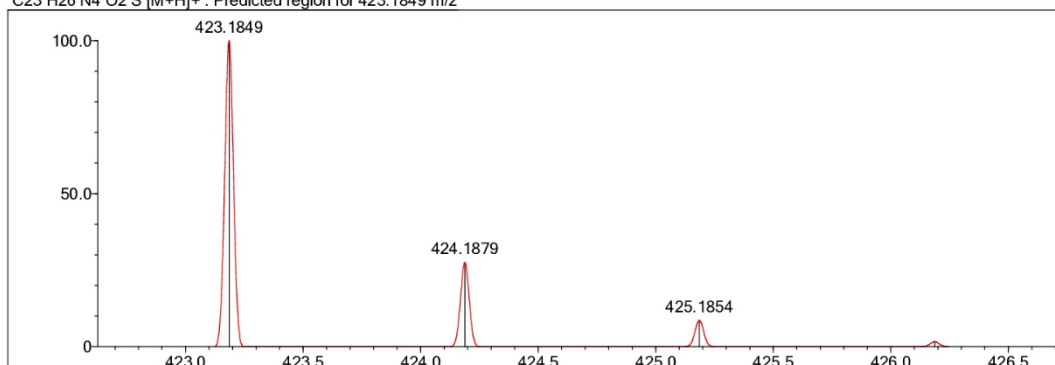

| Rank | Score | Formula (M)     | Ion                | Meas. m/z | Pred. m/z | Df. (mDa) | Df. (ppm) | Iso    | DBE  |
|------|-------|-----------------|--------------------|-----------|-----------|-----------|-----------|--------|------|
| 1    | 96.00 | C23 H26 N4 O2 S | [M+H] <sup>+</sup> | 423.1860  | 423.1849  | 1.1       | 2.60      | 100.00 | 13.0 |

Figure S38. HRMS spectra of compounds 4j

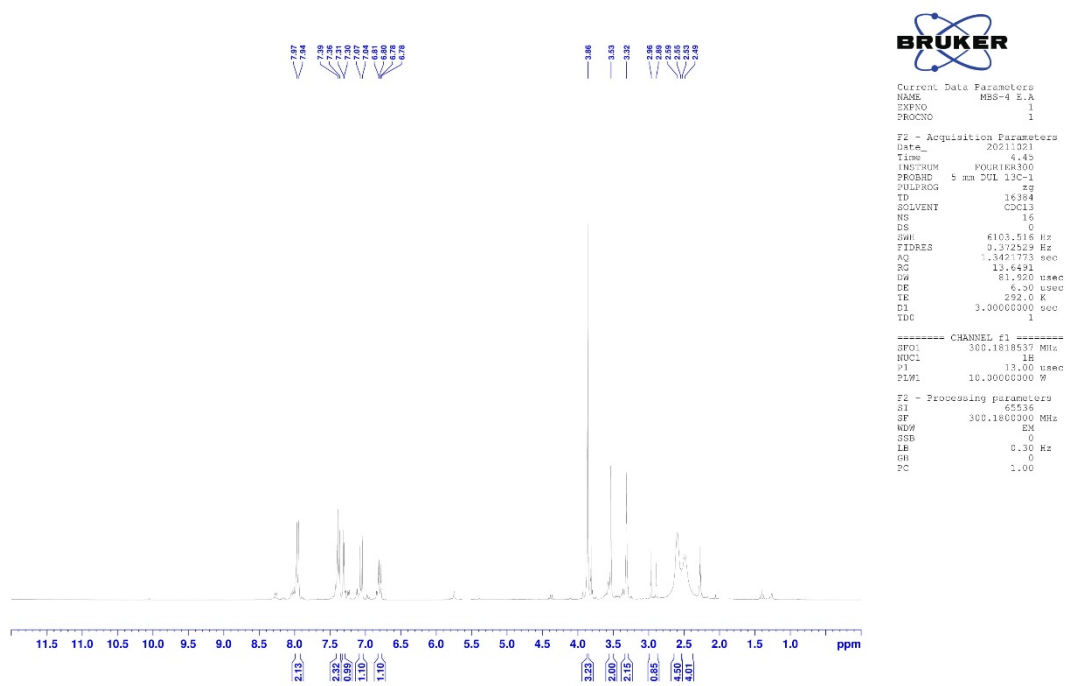

Figure S39. <sup>1</sup>H-NMR spectra of compounds 4k

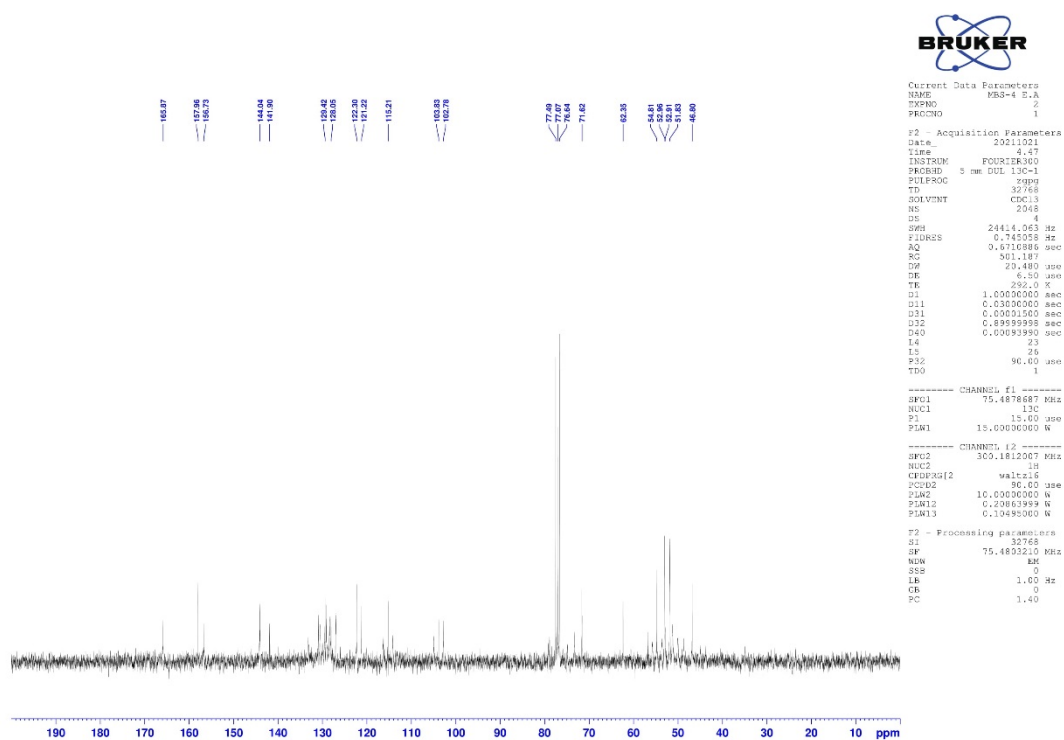

Figure S40. <sup>13</sup>C-NMR spectra of compounds 4k

Data File: C:\LabSolutions\Data\Analiz\dera\MBS-4\_169.lcd

| Elmt | Val. | Min | Max | Use Adduct |
|------|------|-----|-----|------|------|-----|-----|------|------|-----|-----|------|------|-----|-----|------------|
| H    | 1    | 10  | 40  | O    | 2    | 0   | 5   | S    | 2    | 0   | 1   | Ru   | 2    | 0   | 0   | H          |
| C    | 4    | 10  | 40  | F    | 1    | 0   | 0   | Cl   | 1    | 0   | 0   | Pd   | 2    | 0   | 0   |            |
| N    | 3    | 2   | 5   | P    | 3    | 0   | 0   | Br   | 1    | 0   | 0   | I    | 3    | 0   | 0   |            |

Error Margin (ppm): 5  
 DBE Range: 5.0 - 15.0  
 Electron Ions: both  
 HC Ratio: unlimited  
 Apply N Rule: yes  
 Use MSn Info: yes  
 Max Isotopes: 3  
 Isotope RI (%): 1.00  
 MSn Iso RI (%): 10.00  
 MSn Logic Mode: AND  
 Isotope Res: 9000  
 Max Results: 150

Event#: 1 MS(E+) Ret. Time : 2.000 Scan# : 301

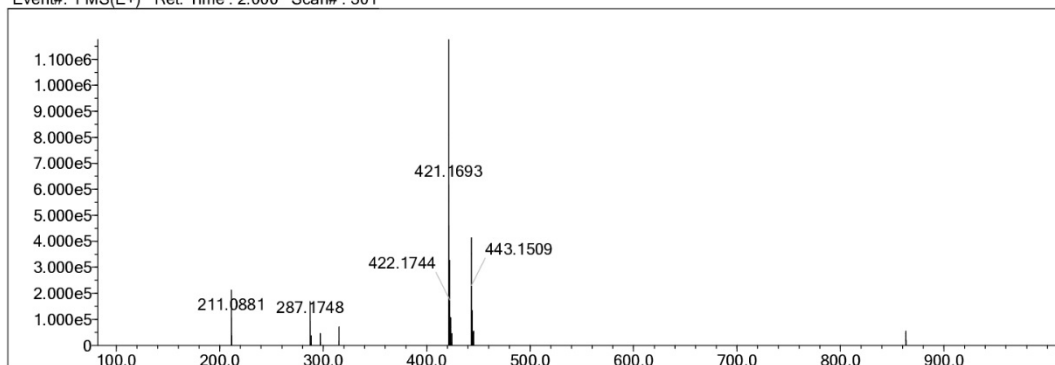

Measured region for 421.1693 m/z

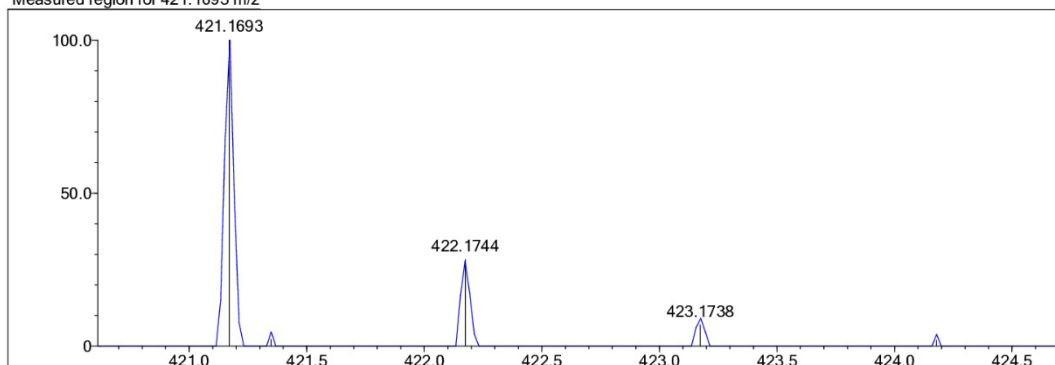

C23 H24 N4 O2 S [M+H]<sup>+</sup> : Predicted region for 421.1693 m/z

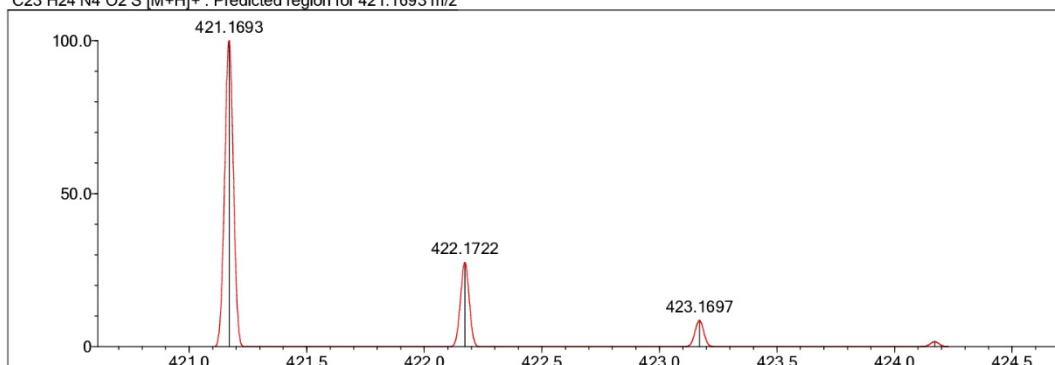

| Rank | Score | Formula (M)     | Ion                | Meas. m/z | Pred. m/z | Df. (mDa) | Df. (ppm) | Iso   | DBE  |
|------|-------|-----------------|--------------------|-----------|-----------|-----------|-----------|-------|------|
| 1    | 77.64 | C23 H24 N4 O2 S | [M+H] <sup>+</sup> | 421.1693  | 421.1693  | 0.0       | 0.00      | 77.64 | 14.0 |

Figure S41. HRMS spectra of compounds 4k

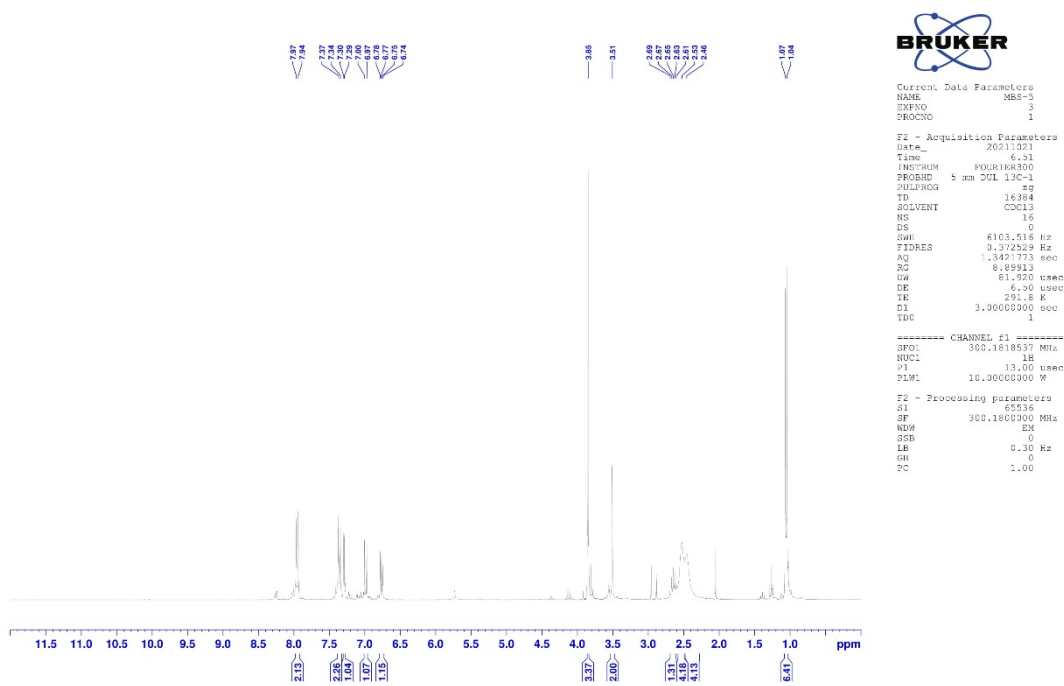

Figure S42. <sup>1</sup>H-NMR spectra of compounds 4I

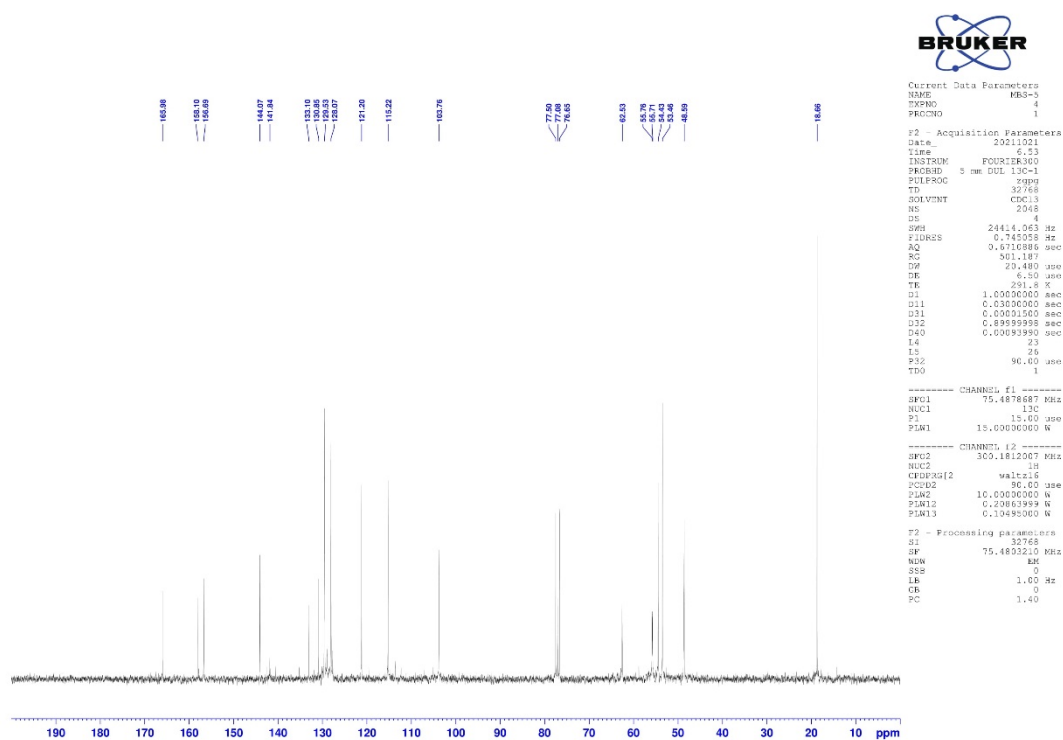

Figure S43. <sup>13</sup>C-NMR spectra of compounds 4I



Data File: C:\LabSolutions\Data\Analiz\derya\MBS-5\_170.lcd

| Elmt | Val. | Min | Max | Use Adduct |
|------|------|-----|-----|------|------|-----|-----|------|------|-----|-----|------|------|-----|-----|------------|
| H    | 1    | 10  | 40  | O    | 2    | 0   | 5   | S    | 2    | 0   | 1   | Ru   | 2    | 0   | 0   | H          |
| C    | 4    | 10  | 40  | F    | 1    | 0   | 0   | Cl   | 1    | 0   | 0   | Pd   | 2    | 0   | 0   |            |
| N    | 3    | 2   | 5   | P    | 3    | 0   | 0   | Br   | 1    | 0   | 0   | I    | 3    | 0   | 0   |            |

Error Margin (ppm): 5  
 DBE Range: 5.0 - 15.0  
 Electron Ions: both  
 HC Ratio: unlimited  
 Apply N Rule: yes  
 Use MSn Info: yes  
 Max Isotopes: 3  
 Isotope RI (%): 1.00  
 MSn Iso RI (%): 10.00  
 MSn Logic Mode: AND  
 Max Results: 150

Event#: 1 MS(E+) Ret. Time : 2.053 Scan# : 309

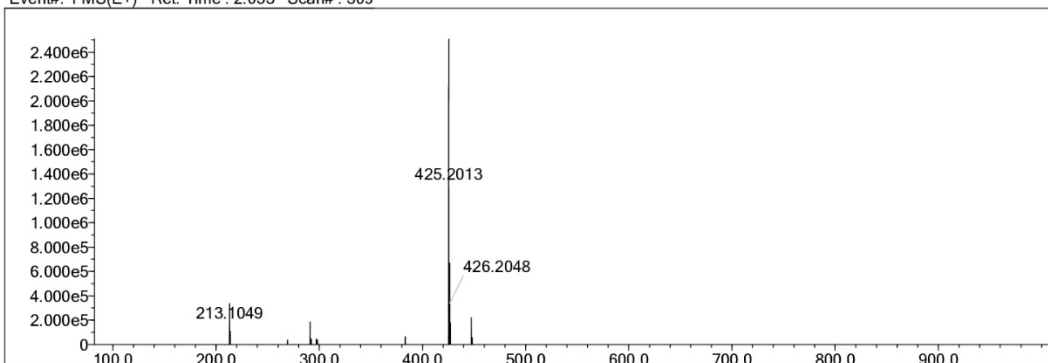

Measured region for 425.2013 m/z

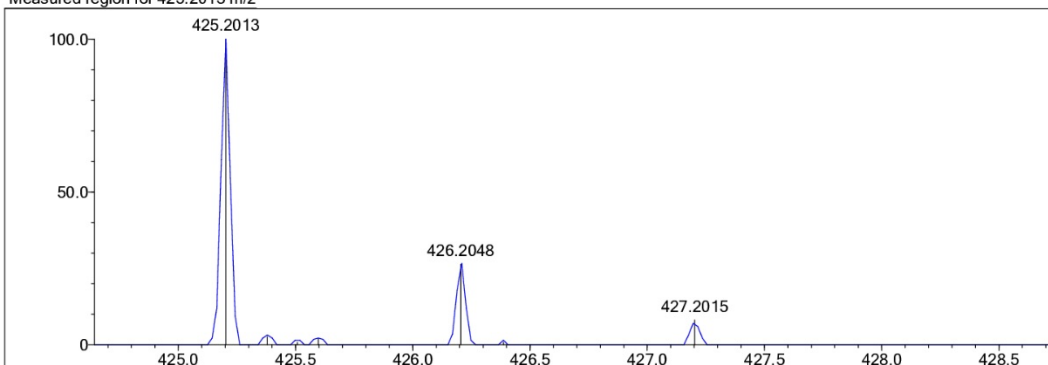

C23 H28 N4 O2 S [M+H]+ : Predicted region for 425.2006 m/z

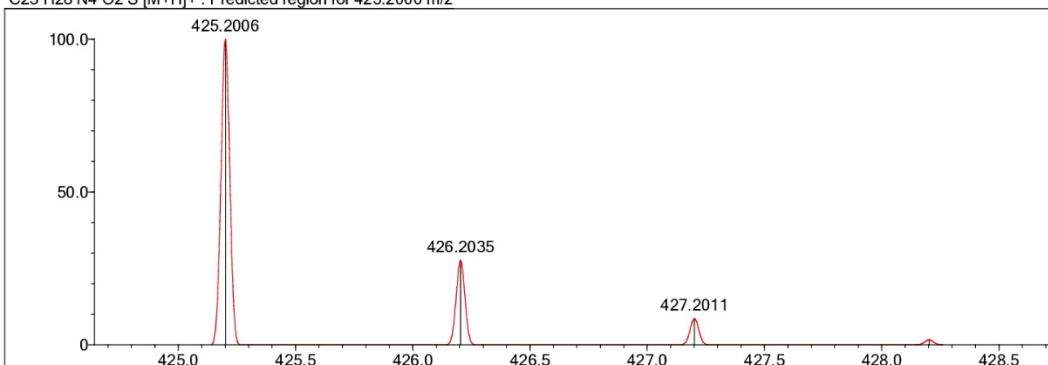

| Rank | Score | Formula (M)     | Ion                | Meas. m/z | Pred. m/z | Df. (mDa) | Df. (ppm) | Iso   | DBE  |
|------|-------|-----------------|--------------------|-----------|-----------|-----------|-----------|-------|------|
| 1    | 83.75 | C23 H28 N4 O2 S | [M+H] <sup>+</sup> | 425.2013  | 425.2006  | 0.7       | 1.65      | 85.13 | 12.0 |

Figure S44. HRMS spectra of compounds 4l

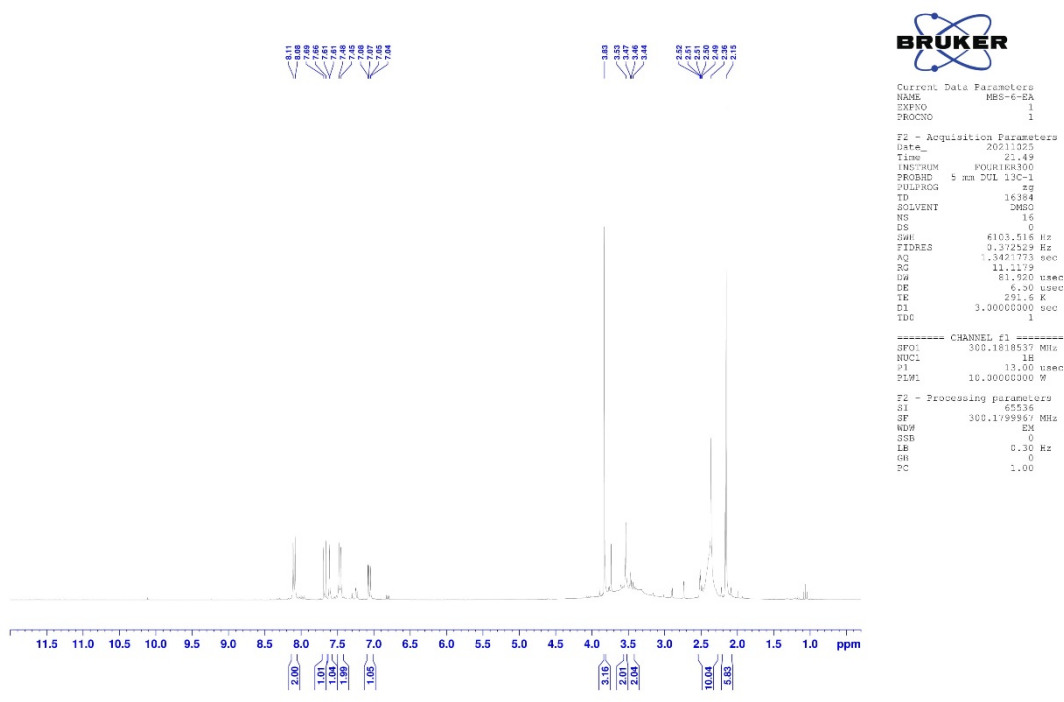

Figure S45. <sup>1</sup>H-NMR spectra of compounds **4m**

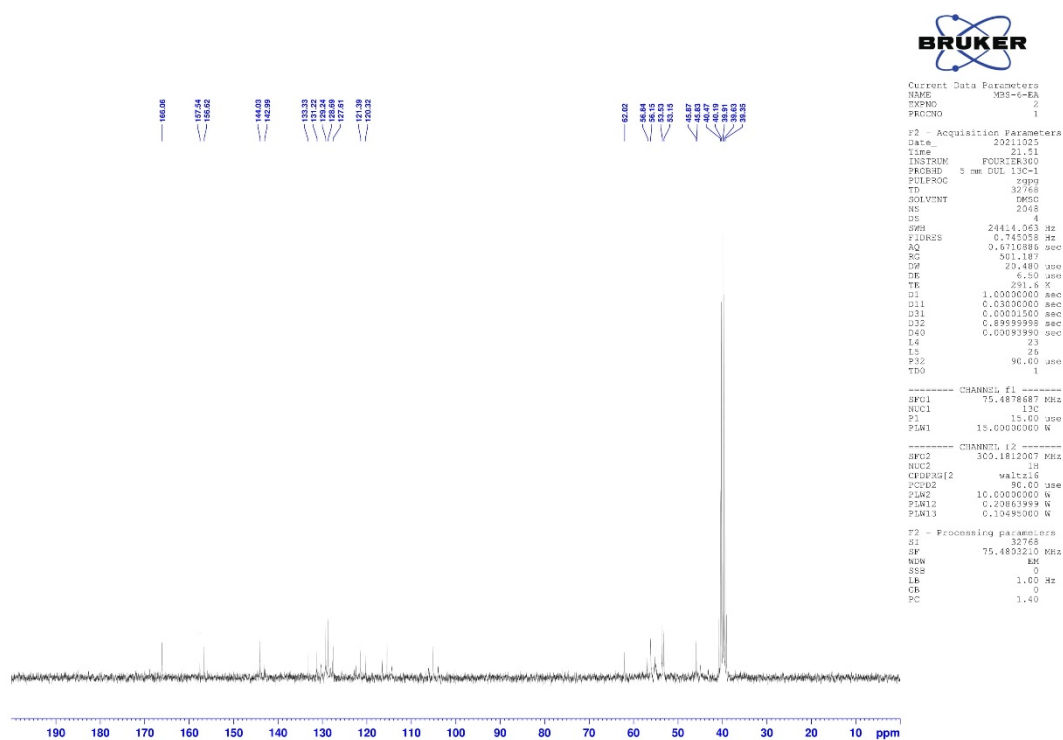

Figure S46. <sup>13</sup>C-NMR spectra of compounds **4m**

Data File: C:\LabSolutions\Data\Analyze\dera\MBS-6\_171.lcd

| Elmt | Val. | Min | Max | Use Adduct |
|------|------|-----|-----|------|------|-----|-----|------|------|-----|-----|------|------|-----|-----|------------|
| H    | 1    | 10  | 40  | O    | 2    | 0   | 5   | S    | 2    | 0   | 1   | Ru   | 2    | 0   | 0   | H          |
| C    | 4    | 10  | 40  | F    | 1    | 0   | 0   | Cl   | 1    | 0   | 0   | Pd   | 2    | 0   | 0   |            |
| N    | 3    | 2   | 5   | P    | 3    | 0   | 0   | Br   | 1    | 0   | 0   | I    | 3    | 0   | 0   |            |

Error Margin (ppm): 5

DBE Range: 5.0 - 15.0

Electron Ions: both

HC Ratio: unlimited

Apply N Rule: yes

Use MSn Info: yes

Max Isotopes: 3

Isotope RI (%): 1.00

Isotope Res: 9000

MSn Iso RI (%): 10.00

MSn Logic Mode: AND

Max Results: 150

Event#: 1 MS(E+) Ret. Time: 1.880 Scan#: 283

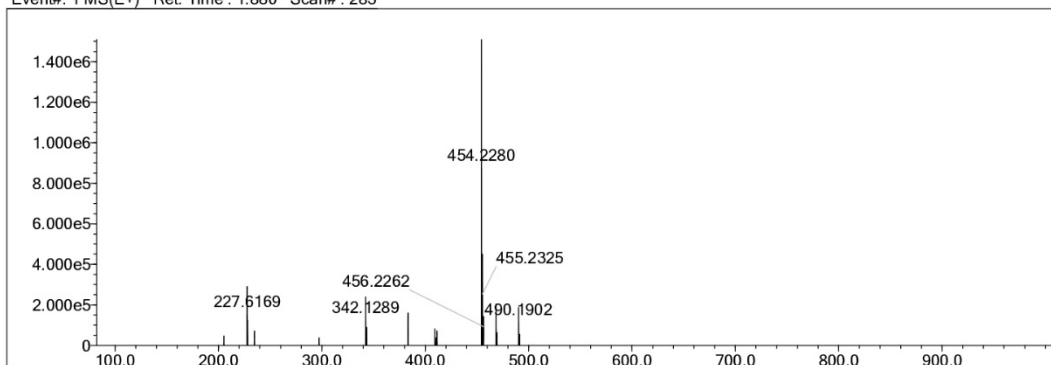

Measured region for 454.2280 m/z

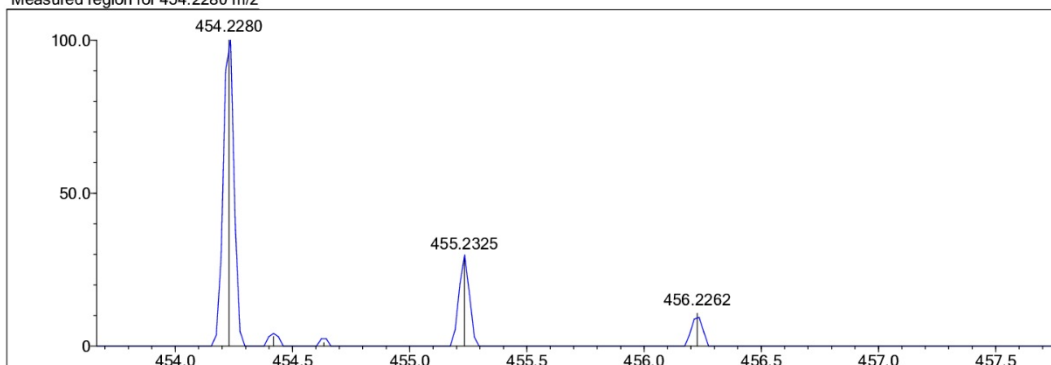

C24 H31 N5 O2 S [M+H]+ : Predicted region for 454.2271 m/z

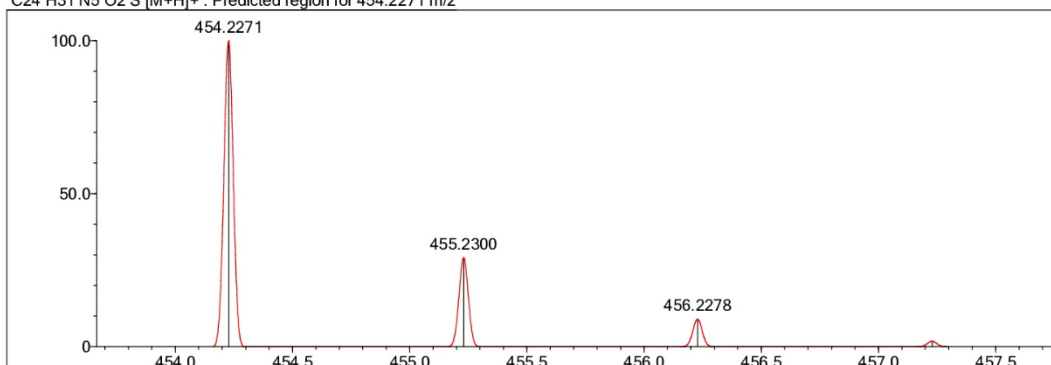

| Rank | Score | Formula (M)     | Ion                | Meas. m/z | Pred. m/z | Df. (mDa) | Df. (ppm) | Iso   | DBE  |
|------|-------|-----------------|--------------------|-----------|-----------|-----------|-----------|-------|------|
| 1    | 87.16 | C24 H31 N5 O2 S | [M+H] <sup>+</sup> | 454.2280  | 454.2271  | 0.9       | 1.98      | 89.35 | 12.0 |

Figure S47. HRMS spectra of compounds 4m

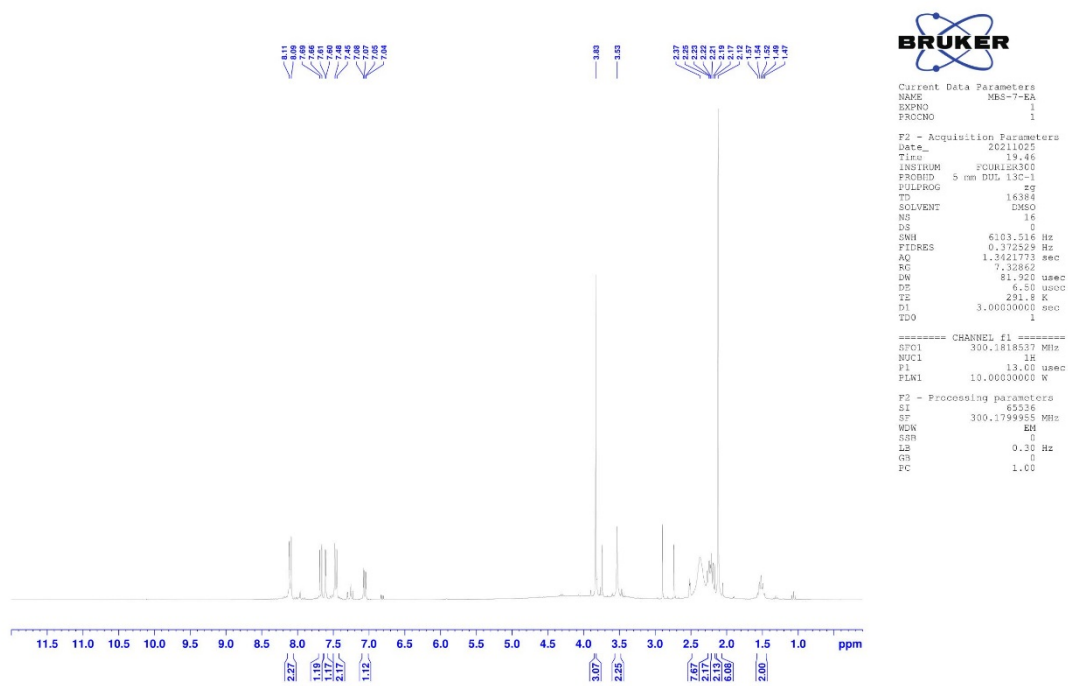

Figure S48. <sup>1</sup>H-NMR spectra of compounds 4n

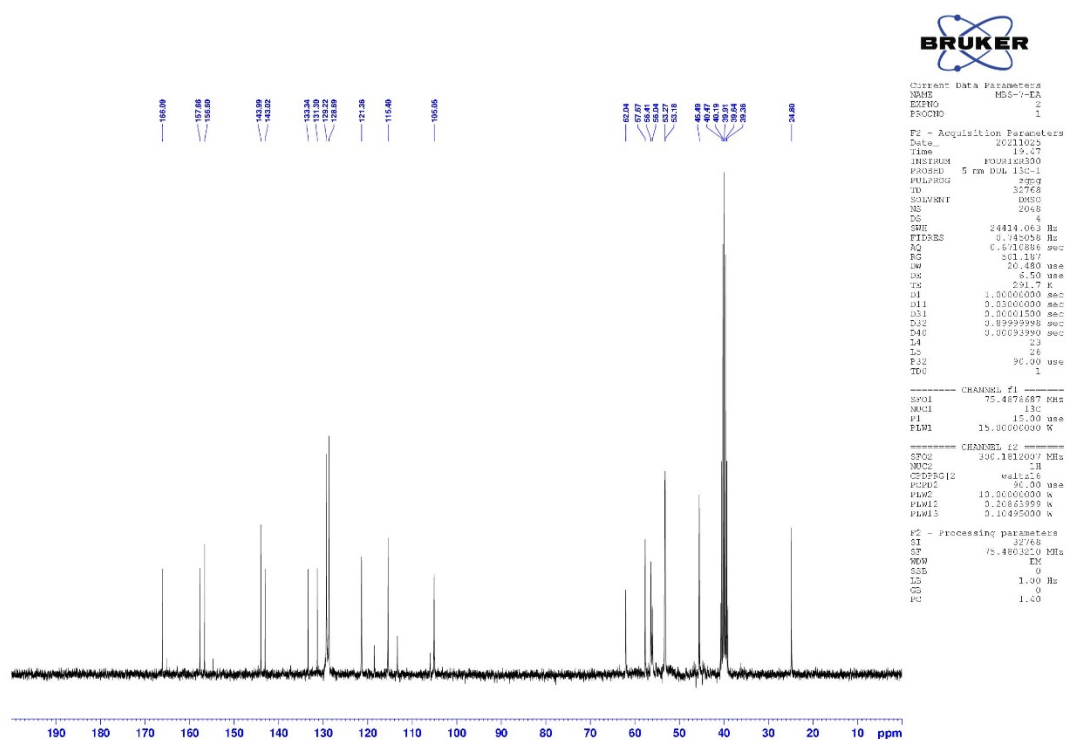

Figure S49. <sup>13</sup>C-NMR spectra of compounds 4n

Data File: C:\LabSolutions\Data\Analiz\derya\MBS-7\_172.lcd

| Elmt | Val. | Min | Max | Use Adduct |
|------|------|-----|-----|------|------|-----|-----|------|------|-----|-----|------|------|-----|-----|------------|
| H    | 1    | 10  | 40  | O    | 2    | 0   | 5   | S    | 2    | 0   | 1   | Ru   | 2    | 0   | 0   | H          |
| C    | 4    | 10  | 40  | F    | 1    | 0   | 0   | Cl   | 1    | 0   | 0   | Pd   | 2    | 0   | 0   |            |
| N    | 3    | 2   | 5   | P    | 3    | 0   | 0   | Br   | 1    | 0   | 0   | I    | 3    | 0   | 0   |            |

Error Margin (ppm): 5  
 HC Ratio: unlimited  
 Max Isotopes: 3  
 MSn Iso RI (%): 10.00

DBE Range: 5.0 - 15.0  
 Apply N Rule: yes  
 Isotope RI (%): 1.00  
 MSn Logic Mode: AND

Electron Ions: both  
 Use MSn Info: yes  
 Isotope Res: 9000  
 Max Results: 150

Event#: 1 MS(E+) Ret. Time: 1.947 Scan#: 293

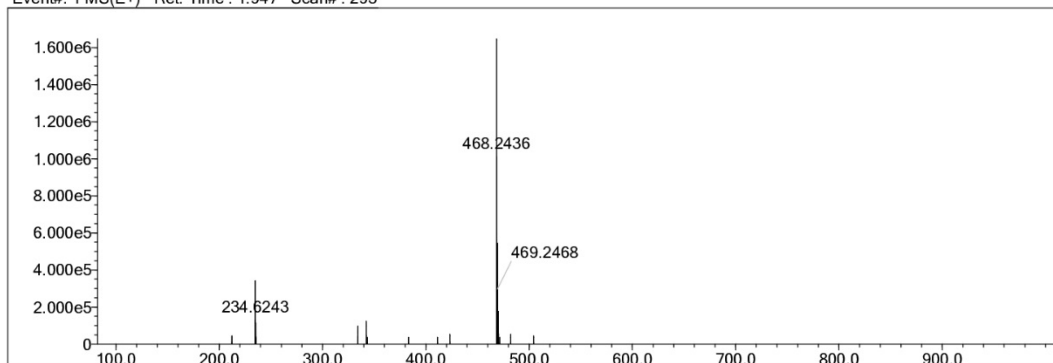

Measured region for 468.2436 m/z

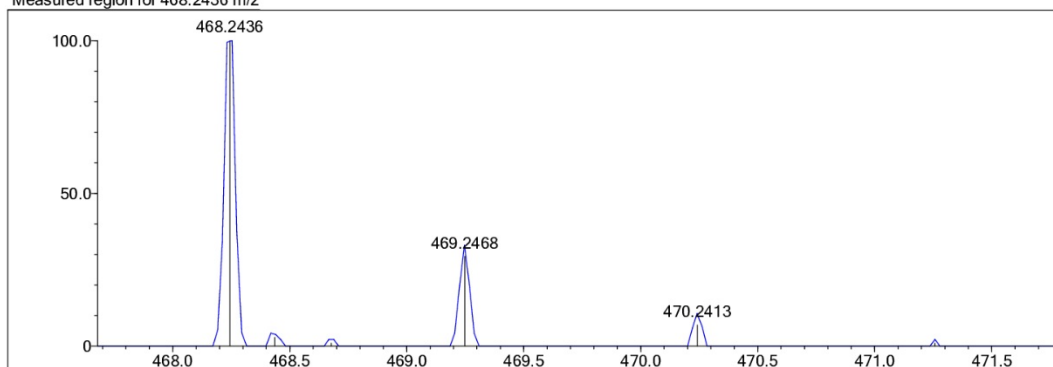

C25 H33 N5 O2 S [M+H]<sup>+</sup> : Predicted region for 468.2428 m/z

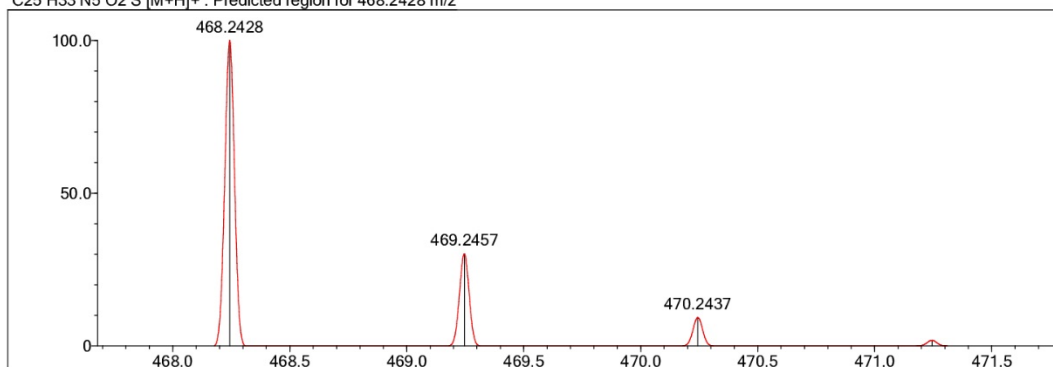

| Rank | Score | Formula (M)     | Ion                | Meas. m/z | Pred. m/z | Df. (mDa) | Df. (ppm) | Iso   | DBE  |
|------|-------|-----------------|--------------------|-----------|-----------|-----------|-----------|-------|------|
| 1    | 77.52 | C25 H33 N5 O2 S | [M+H] <sup>+</sup> | 468.2436  | 468.2428  | 0.8       | 1.71      | 78.92 | 12.0 |

Figure S50. HRMS spectra of compounds **4n**

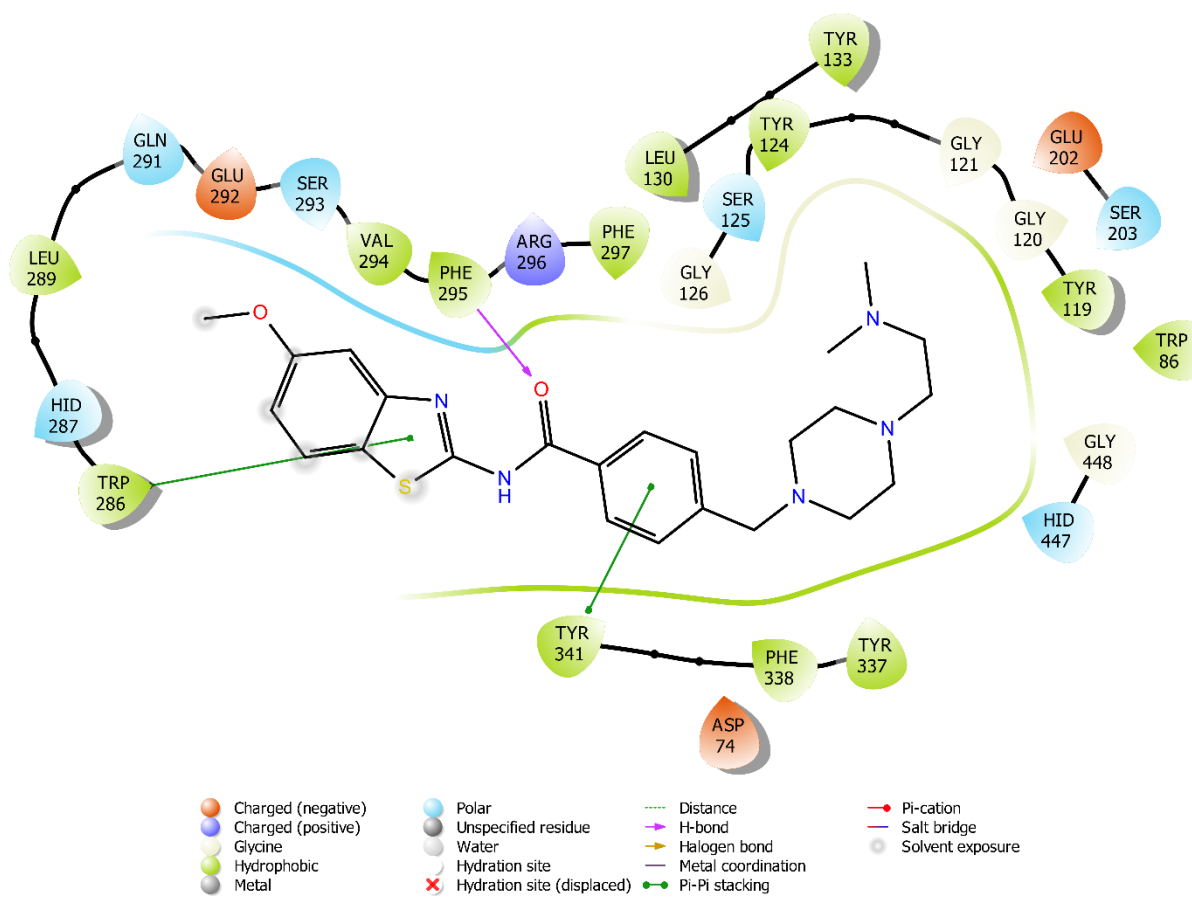

**Figure S51.** 2D interaction of compound **4m** at binding region (PBDID: 4EY7).

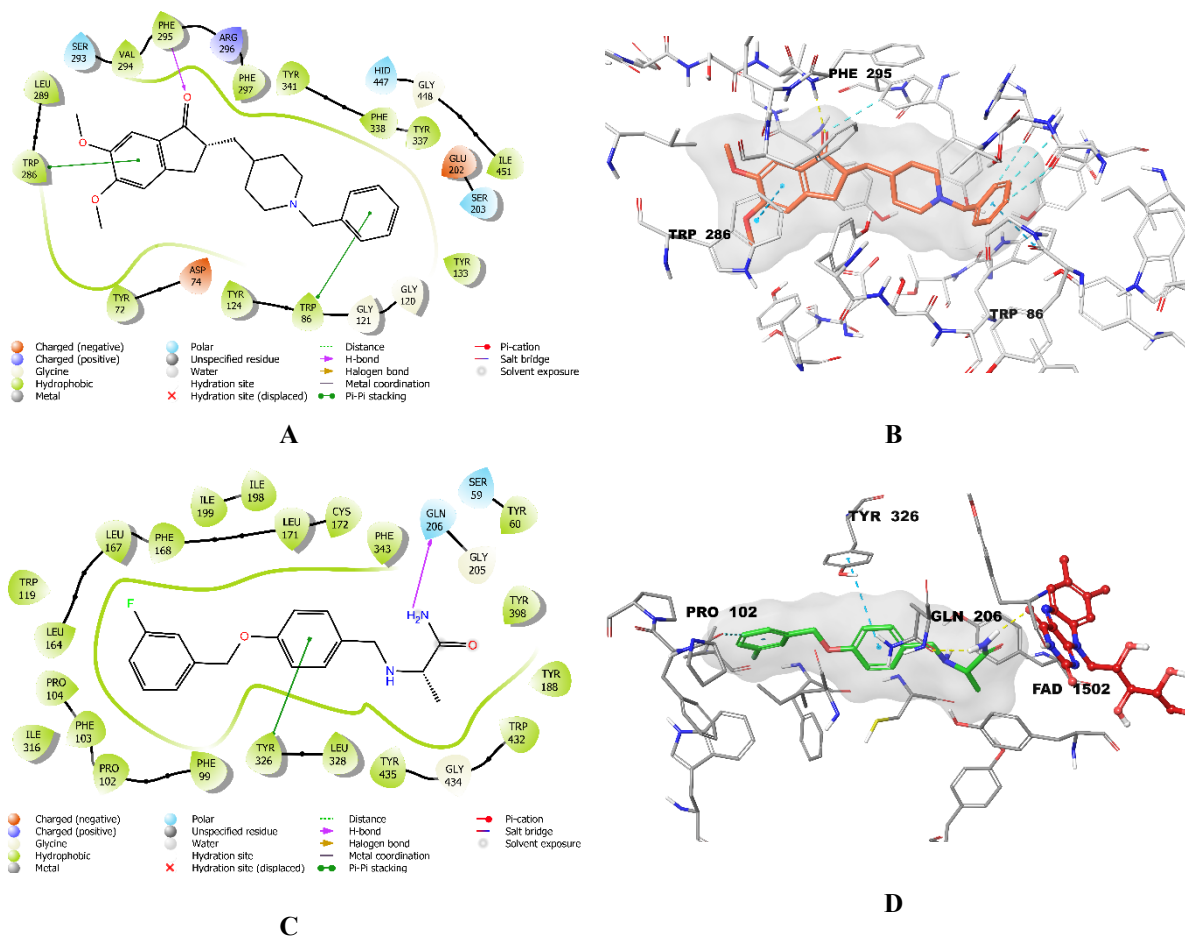

**Figure S52.** The 2D (A) and 3D (B) interacting modes of donepezil (colored with orange) in the active region the AChE (PDB ID: 4EY7). The 2D (C) and 3D (D) interacting modes of safinamide (colored with green) in the active region the MAO-B (PDB ID: 2V5Z).

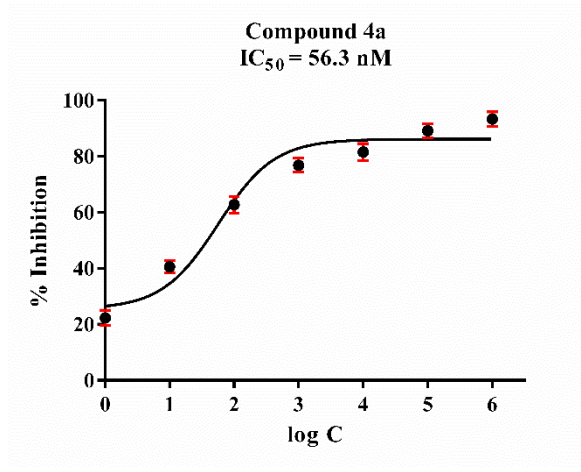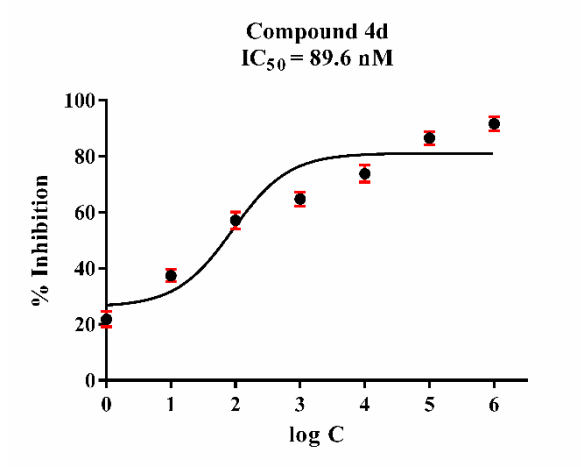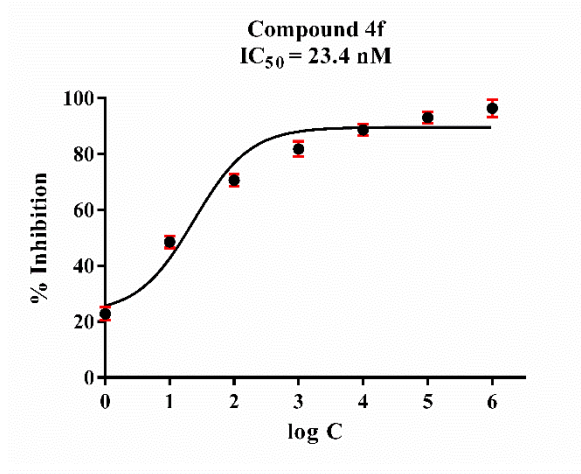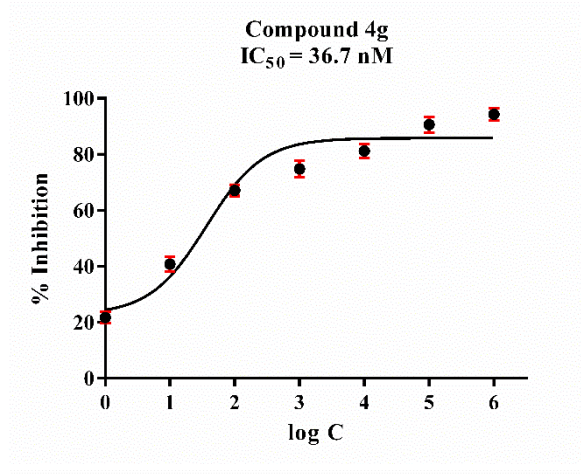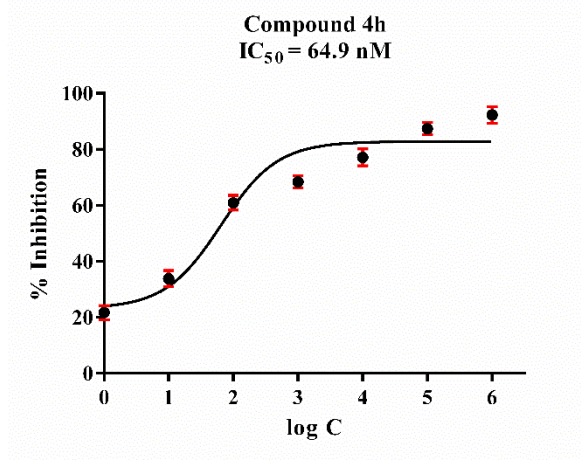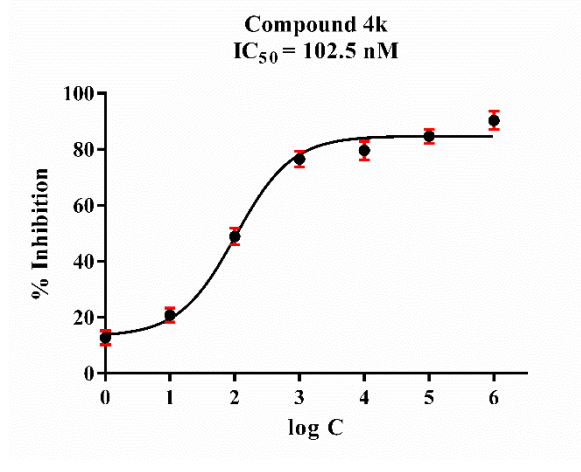



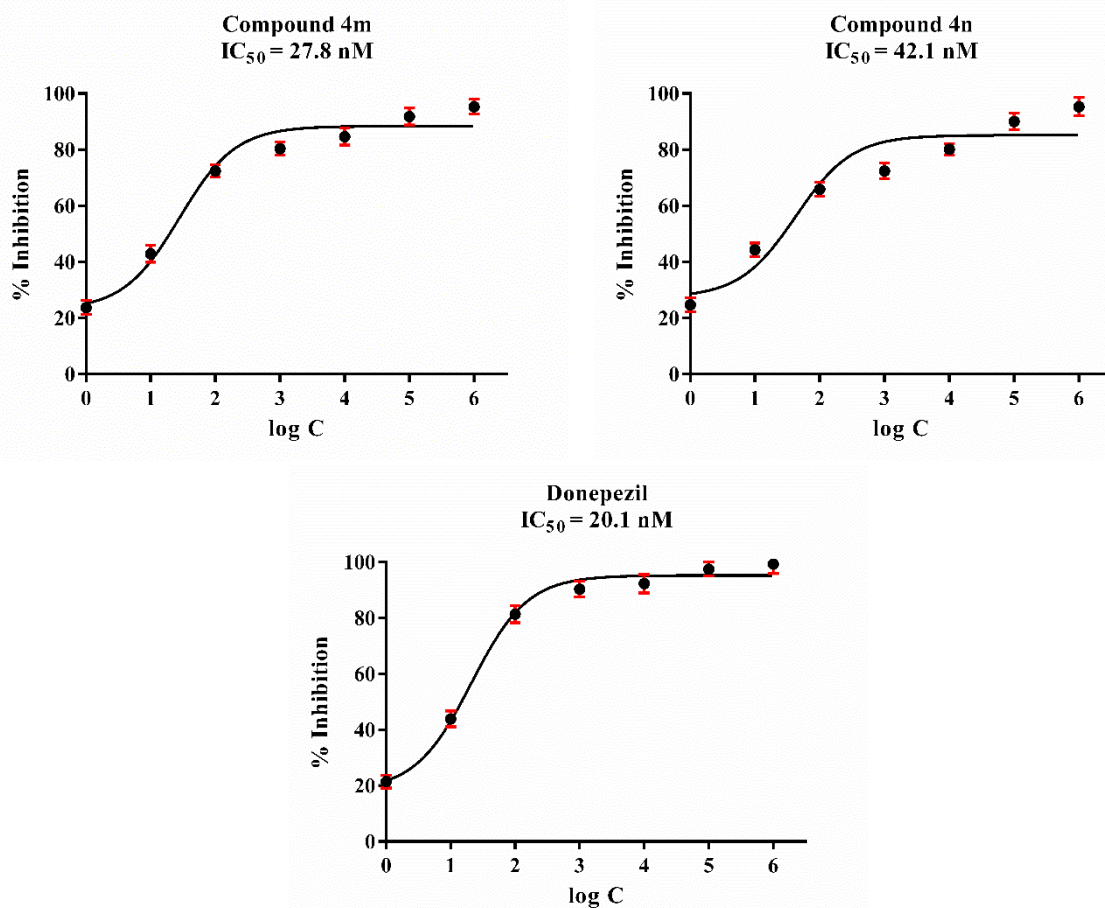

**Figure S53.** The  $IC_{50}$  graphs of compounds **4a**, **4d**, **4f**, **4g**, **4h**, **4k**, **4m**, **4n** and donepezil on AChE enzyme (The graphs are formed using GraphPad Prism Version 6 via regression analyses).

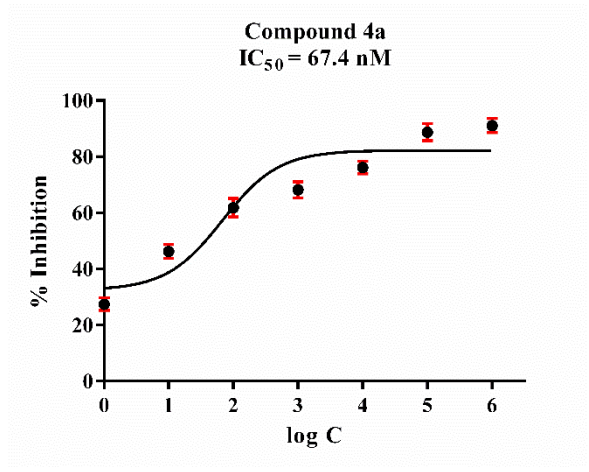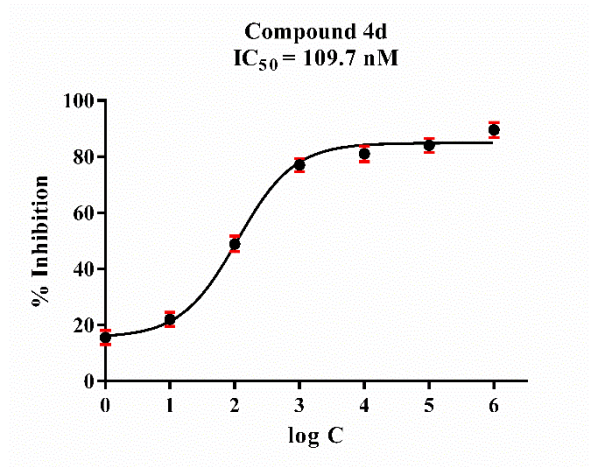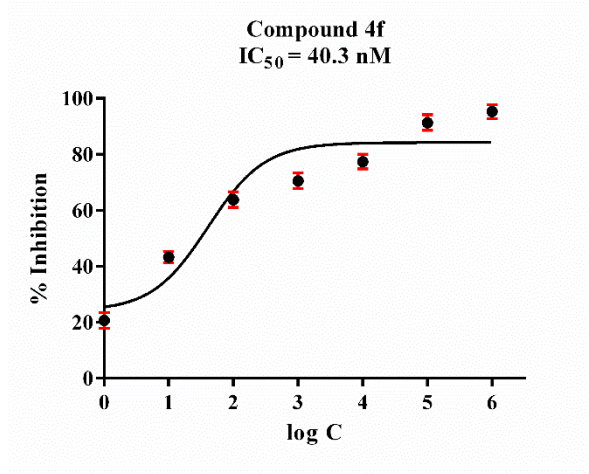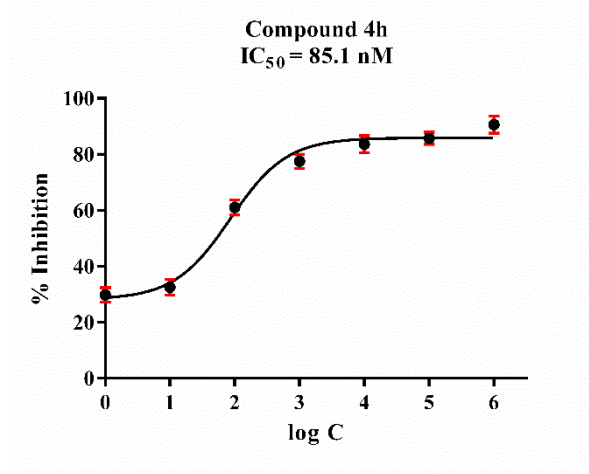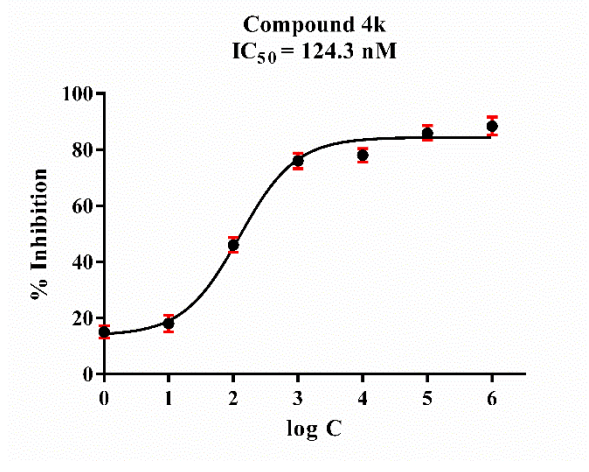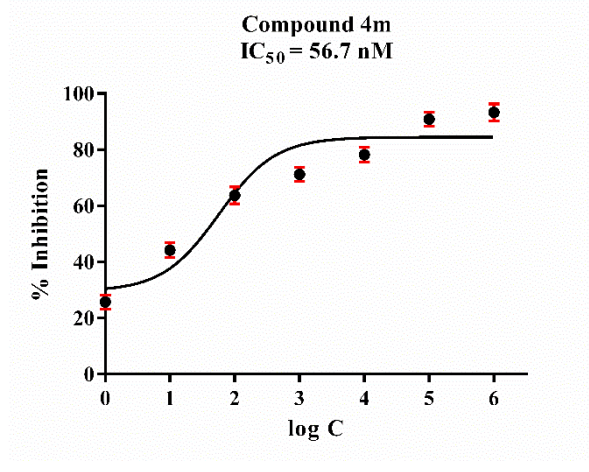

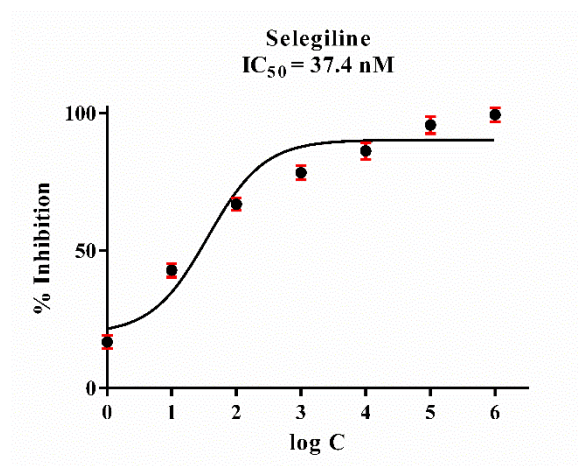

**Figure S54.** The  $IC_{50}$  graphs of compounds **4a**, **4d**, **4f**, **4h**, **4k**, **4m** and selegiline on MAO-B enzyme (The graphs are formed using GraphPad Prism Version 6 via regression analyses).
